# Supplementary material for: The effects of bioavailable gluconate chelated stannous fluoride dentifrice on gingival bleeding: Meta‐analysis of eighteen randomized controlled trials
Source: PubMed Central journal article supplement — J Clin Periodontol. 2019 Nov 14;46(12):1205–16. doi: 10.1111/jcpe.13203 (PMC6899529; doi:10.1111/jcpe.13203), 2019-11-14

### Risk of Bias Assessment - Number of Bleeding Sites

| Study ID              | Experimental | Outcome          | Risk of Bias Assessment  |                                        |                      |                            |                                  |         |   |
|-----------------------|--------------|------------------|--------------------------|----------------------------------------|----------------------|----------------------------|----------------------------------|---------|---|
|                       |              |                  | Randomization process    | Deviations from intended interventions | Missing outcome data | Measurement of the outcome | Selection of the reported result | Overall |   |
| Nachnani 2018, S2     | SnF2         | Negative Control | Number of Bleeding Sites | +                                      | +                    | +                          | +                                | +       | + |
| Nachnani 2018, S3     | SnF2         | Negative Control | Number of Bleeding Sites | +                                      | +                    | +                          | +                                | +       | + |
| Amini 2016, S4        | SnF2         | Negative Control | Number of Bleeding Sites | +                                      | +                    | +                          | +                                | +       | + |
| Amini, 2018           | SnF2         | Negative Control | Number of Bleeding Sites | +                                      | +                    | +                          | +                                | +       | + |
| Goyal 2017, S5        | SnF2         | Negative Control | Number of Bleeding Sites | +                                      | +                    | +                          | +                                | +       | + |
| Garcia-Godoy 2015, S6 | SnF2         | Negative Control | Number of Bleeding Sites | +                                      | +                    | +                          | +                                | +       | + |
| Gerlach & Amini, 2012 | SnF2         | Negative Control | Number of Bleeding Sites | +                                      | +                    | +                          | +                                | +       | + |
| Gerlach 2016, S7      | SnF2         | Negative Control | Number of Bleeding Sites | +                                      | +                    | +                          | +                                | +       | + |
| Mallatt, 2007         | SnF2         | Negative Control | Number of Bleeding Sites | +                                      | +                    | +                          | +                                | +       | + |
| Mankodi, 2005         | SnF2         | Negative Control | Number of Bleeding Sites | +                                      | +                    | +                          | +                                | +       | + |
| McClanahan, 1997      | SnF2         | Negative Control | Number of Bleeding Sites | +                                      | +                    | +                          | +                                | +       | + |
| Beiswanger, 1995      | SnF2         | Negative Control | Number of Bleeding Sites | +                                      | +                    | +                          | +                                | +       | + |
| He, 2017b             | SnF2         | Positive Control | Number of Bleeding Sites | +                                      | +                    | +                          | +                                | +       | + |
| He, 2013b             | SnF2         | Positive Control | Number of Bleeding Sites | +                                      | +                    | +                          | +                                | +       | + |
| He, 2012a             | SnF2         | Positive Control | Number of Bleeding Sites | +                                      | +                    | +                          | +                                | +       | + |
| He, 2012b             | SnF2         | Positive Control | Number of Bleeding Sites | +                                      | +                    | +                          | +                                | +       | + |
| Mankodi 2009, S8      | SnF2         | Positive Control | Number of Bleeding Sites | +                                      | +                    | +                          | +                                | +       | + |
| Archila, 2005         | SnF2         | Positive Control | Number of Bleeding Sites | +                                      | +                    | +                          | +                                | +       | + |
| McClanahan, 1997      | SnF2         | Positive Control | Number of Bleeding Sites | +                                      | +                    | +                          | +                                | +       | + |

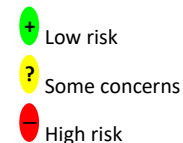

Supplement: JCPE-46-1205-s002.pdf [file JCPE-46-1205-s002.pdf]
