# Supplementary material for: The effects of bioavailable gluconate chelated stannous fluoride dentifrice on gingival bleeding: Meta‐analysis of eighteen randomized controlled trials
Source: PubMed Central journal article supplement — J Clin Periodontol. 2019 Nov 14;46(12):1205–16. doi: 10.1111/jcpe.13203 (PMC6899529; doi:10.1111/jcpe.13203), 2019-11-14
Supplement: JCPE-46-1205-s001.pdf [file JCPE-46-1205-s001.pdf]

|                                                           |                                                                                                                                                                                     |                   |                                                      |                                                  |                                                                              |
|-----------------------------------------------------------|-------------------------------------------------------------------------------------------------------------------------------------------------------------------------------------|-------------------|------------------------------------------------------|--------------------------------------------------|------------------------------------------------------------------------------|
| <b>Unique ID</b>                                          | 1                                                                                                                                                                                   | <b>Study ID</b>   | Nachnani 2018, S2                                    | <b>Assessor</b>                                  | JD                                                                           |
| <b>Ref or Label</b>                                       | Nachnani 2018, S2                                                                                                                                                                   | <b>Aim</b>        | adhering to intervention (the 'per-protocol' effect) | <b>The effect of adhering to intervention...</b> | non-adherence to their assigned intervention by trial participants           |
| <b>Experimental</b>                                       | SnF2                                                                                                                                                                                | <b>Comparator</b> | Negative Control                                     | <b>Source</b>                                    | Conference abstract(s) about the trial                                       |
| <b>Outcome</b>                                            | Number of Bleeding Sites                                                                                                                                                            | <b>Results</b>    | Mean treatment difference                            | <b>Weight</b>                                    | 1                                                                            |
| <b>Domain</b>                                             | <b>Signalling question</b>                                                                                                                                                          |                   | <b>Response</b>                                      |                                                  | <b>Comments</b>                                                              |
| <b>Bias arising from the randomization process</b>        | 1.1 Was the allocation sequence random?                                                                                                                                             |                   | Y                                                    |                                                  | Randomized, controlled, double-blind, 2-treatment, parallel-group study      |
|                                                           | 1.2 Was the allocation sequence concealed until participants were enrolled and assigned to interventions?                                                                           |                   | PY                                                   |                                                  |                                                                              |
|                                                           | 1.3 Did baseline differences between intervention groups suggest a problem with the randomization process?                                                                          |                   | N                                                    |                                                  | Groups were balanced on demographics & baseline plaque and gingivitis scores |
|                                                           | <b>Risk of bias judgement</b>                                                                                                                                                       |                   | <b>Low</b>                                           |                                                  |                                                                              |
| <b>Bias due to deviations from intended interventions</b> | 2.1 Were participants aware of their assigned intervention during the trial?                                                                                                        |                   | N                                                    |                                                  | Double-blind                                                                 |
|                                                           | 2.2 Were carers and people delivering the interventions aware of participants' assigned intervention during the trial?                                                              |                   | N                                                    |                                                  |                                                                              |
|                                                           | 2.3. [If applicable:] If Y/PY/NI to 2.1 or 2.2: Were important non-protocol interventions balanced across intervention groups?                                                      |                   | NA                                                   |                                                  |                                                                              |
|                                                           | 2.4. [If applicable:] Were there failures in implementing the intervention that could have affected the outcome?                                                                    |                   | NA                                                   |                                                  |                                                                              |
|                                                           | 2.5. [If applicable:] Was there non-adherence to the assigned intervention regimen that could have affected participants' outcomes?                                                 |                   | PN                                                   |                                                  |                                                                              |
|                                                           | 2.6. If N/PN/NI to 2.3, or Y/PY/NI to 2.4 or 2.5: Was an appropriate analysis used to estimate the effect of adhering to the intervention?                                          |                   | NA                                                   |                                                  |                                                                              |
|                                                           | <b>Risk of bias judgement</b>                                                                                                                                                       |                   | <b>Low</b>                                           |                                                  |                                                                              |
| <b>Bias due to missing outcome data</b>                   | 3.1 Were data for this outcome available for all, or nearly all, participants randomized?                                                                                           |                   | Y                                                    |                                                  | 74 of the 84 subjects randomized completed the study                         |
|                                                           | 3.2 If N/PN/NI to 3.1: Is there evidence that result was not biased by missing outcome data?                                                                                        |                   | NA                                                   |                                                  |                                                                              |
|                                                           | 3.3 If N/PN to 3.2: Could missingness in the outcome depend on its true value?                                                                                                      |                   | NA                                                   |                                                  |                                                                              |
|                                                           | 3.4 If Y/PY/NI to 3.3: Is it likely that missingness in the outcome depended on its true value?                                                                                     |                   | NA                                                   |                                                  |                                                                              |
|                                                           | <b>Risk of bias judgement</b>                                                                                                                                                       |                   | <b>Low</b>                                           |                                                  |                                                                              |
| <b>Bias in measurement of the outcome</b>                 | 4.1 Was the method of measuring the outcome inappropriate?                                                                                                                          |                   | N                                                    |                                                  | Standard dentistry bleeding site assessments were used                       |
|                                                           | 4.2 Could measurement or ascertainment of the outcome have differed between intervention groups?                                                                                    |                   | N                                                    |                                                  |                                                                              |
|                                                           | 4.3 Were outcome assessors aware of the intervention received by study participants?                                                                                                |                   | N                                                    |                                                  | The study was double-blind or examiner-blinded                               |
|                                                           | 4.4 If Y/PY/NI to 4.3: Could assessment of the outcome have been influenced by knowledge of intervention received?                                                                  |                   | NA                                                   |                                                  |                                                                              |
|                                                           | 4.5 If Y/PY/NI to 4.4: Is it likely that assessment of the outcome was influenced by knowledge of intervention received?                                                            |                   | NA                                                   |                                                  |                                                                              |
|                                                           | <b>Risk of bias judgement</b>                                                                                                                                                       |                   | <b>Low</b>                                           |                                                  |                                                                              |
| <b>Bias in selection of the reported result</b>           | 5.1 Were the data that produced this result analysed in accordance with a pre-specified analysis plan that was finalized before unblinded outcome data were available for analysis? |                   | PY                                                   |                                                  |                                                                              |
|                                                           | 5.2 ... multiple eligible outcome measurements (e.g. scales, definitions, time points) within the outcome domain?                                                                   |                   | N                                                    |                                                  |                                                                              |
|                                                           | 5.3 ... multiple eligible analyses of the data?                                                                                                                                     |                   | N                                                    |                                                  |                                                                              |
|                                                           | <b>Risk of bias judgement</b>                                                                                                                                                       |                   | <b>Low</b>                                           |                                                  |                                                                              |
| <b>Overall bias</b>                                       | <b>Risk of bias judgement</b>                                                                                                                                                       |                   | <b>Low</b>                                           |                                                  |                                                                              |

|                                                           |                                                                                                                                                                                     |                   |                                                      |                                                  |                                                                                                                                                                                                                               |
|-----------------------------------------------------------|-------------------------------------------------------------------------------------------------------------------------------------------------------------------------------------|-------------------|------------------------------------------------------|--------------------------------------------------|-------------------------------------------------------------------------------------------------------------------------------------------------------------------------------------------------------------------------------|
| <b>Unique ID</b>                                          | 2                                                                                                                                                                                   | <b>Study ID</b>   | Nachnani 2018, S3                                    | <b>Assessor</b>                                  | JD                                                                                                                                                                                                                            |
| <b>Ref or Label</b>                                       | Nachnani 2018, S3                                                                                                                                                                   | <b>Aim</b>        | adhering to intervention (the 'per-protocol' effect) | <b>The effect of adhering to intervention...</b> | non-adherence to their assigned intervention by trial participants                                                                                                                                                            |
| <b>Experimental</b>                                       | SnF2                                                                                                                                                                                | <b>Comparator</b> | Negative Control                                     | <b>Source</b>                                    | Conference abstract(s) about the trial                                                                                                                                                                                        |
| <b>Outcome</b>                                            | Number of Bleeding Sites                                                                                                                                                            | <b>Results</b>    | Mean treatment difference                            | <b>Weight</b>                                    | 1                                                                                                                                                                                                                             |
| <b>Domain</b>                                             | <b>Signalling question</b>                                                                                                                                                          |                   |                                                      | <b>Response</b>                                  | <b>Comments</b>                                                                                                                                                                                                               |
| <b>Bias arising from the randomization process</b>        | 1.1 Was the allocation sequence random?                                                                                                                                             |                   |                                                      | Y                                                | After one week of acclimation subjects were randomly assigned to one of two groups. Test products were dispensed in blinded over-labeled kits.<br>Treatment groups were well balanced with respect to baseline bleeding sites |
|                                                           | 1.2 Was the allocation sequence concealed until participants were enrolled and assigned to interventions?                                                                           |                   |                                                      | Y                                                |                                                                                                                                                                                                                               |
|                                                           | 1.3 Did baseline differences between intervention groups suggest a problem with the randomization process?                                                                          |                   |                                                      | PN                                               |                                                                                                                                                                                                                               |
|                                                           | <b>Risk of bias judgement</b>                                                                                                                                                       |                   |                                                      | <b>Low</b>                                       |                                                                                                                                                                                                                               |
| <b>Bias due to deviations from intended interventions</b> | 2.1 Were participants aware of their assigned intervention during the trial?                                                                                                        |                   |                                                      | N                                                | The assigned paste and brush were dispensed in a blinded kit box                                                                                                                                                              |
|                                                           | 2.2 Were carers and people delivering the interventions aware of participants' assigned intervention during the trial?                                                              |                   |                                                      | N                                                |                                                                                                                                                                                                                               |
|                                                           | 2.3. [If applicable:] If Y/PY/NI to 2.1 or 2.2: Were important non-protocol interventions balanced across intervention groups?                                                      |                   |                                                      | NA                                               |                                                                                                                                                                                                                               |
|                                                           | 2.4. [If applicable:] Were there failures in implementing the intervention that could have affected the outcome?                                                                    |                   |                                                      | NA                                               |                                                                                                                                                                                                                               |
|                                                           | 2.5. [If applicable:] Was there non-adherence to the assigned intervention regimen that could have affected participants' outcomes?                                                 |                   |                                                      | N                                                |                                                                                                                                                                                                                               |
|                                                           | 2.6. If N/PN/NI to 2.3, or Y/PY/NI to 2.4 or 2.5: Was an appropriate analysis used to estimate the effect of adhering to the intervention?                                          |                   |                                                      | NA                                               |                                                                                                                                                                                                                               |
|                                                           | <b>Risk of bias judgement</b>                                                                                                                                                       |                   |                                                      | <b>Low</b>                                       |                                                                                                                                                                                                                               |
| <b>Bias due to missing outcome data</b>                   | 3.1 Were data for this outcome available for all, or nearly all, participants randomized?                                                                                           |                   |                                                      | Y                                                | 47 of 49 subjects randomized completed the study                                                                                                                                                                              |
|                                                           | 3.2 If N/PN/NI to 3.1: Is there evidence that result was not biased by missing outcome data?                                                                                        |                   |                                                      | NA                                               |                                                                                                                                                                                                                               |
|                                                           | 3.3 If N/PN to 3.2: Could missingness in the outcome depend on its true value?                                                                                                      |                   |                                                      | NA                                               |                                                                                                                                                                                                                               |
|                                                           | 3.4 If Y/PY/NI to 3.3: Is it likely that missingness in the outcome depended on its true value?                                                                                     |                   |                                                      | NA                                               |                                                                                                                                                                                                                               |
|                                                           | <b>Risk of bias judgement</b>                                                                                                                                                       |                   |                                                      | <b>Low</b>                                       |                                                                                                                                                                                                                               |
| <b>Bias in measurement of the outcome</b>                 | 4.1 Was the method of measuring the outcome inappropriate?                                                                                                                          |                   |                                                      | N                                                | Standard dentistry bleeding site assessments were used<br><br>The study was double-blind or examiner-blinded                                                                                                                  |
|                                                           | 4.2 Could measurement or ascertainment of the outcome have differed between intervention groups?                                                                                    |                   |                                                      | N                                                |                                                                                                                                                                                                                               |
|                                                           | 4.3 Were outcome assessors aware of the intervention received by study participants?                                                                                                |                   |                                                      | N                                                |                                                                                                                                                                                                                               |
|                                                           | 4.4 If Y/PY/NI to 4.3: Could assessment of the outcome have been influenced by knowledge of intervention received?                                                                  |                   |                                                      | NA                                               |                                                                                                                                                                                                                               |
|                                                           | 4.5 If Y/PY/NI to 4.4: Is it likely that assessment of the outcome was influenced by knowledge of intervention received?                                                            |                   |                                                      | NA                                               |                                                                                                                                                                                                                               |
|                                                           | <b>Risk of bias judgement</b>                                                                                                                                                       |                   |                                                      | <b>Low</b>                                       |                                                                                                                                                                                                                               |
| <b>Bias in selection of the reported result</b>           | 5.1 Were the data that produced this result analysed in accordance with a pre-specified analysis plan that was finalized before unblinded outcome data were available for analysis? |                   |                                                      | PY                                               |                                                                                                                                                                                                                               |
|                                                           | 5.2 ... multiple eligible outcome measurements (e.g. scales, definitions, time points) within the outcome domain?                                                                   |                   |                                                      | N                                                |                                                                                                                                                                                                                               |
|                                                           | 5.3 ... multiple eligible analyses of the data?                                                                                                                                     |                   |                                                      | N                                                |                                                                                                                                                                                                                               |
|                                                           | <b>Risk of bias judgement</b>                                                                                                                                                       |                   |                                                      | <b>Low</b>                                       |                                                                                                                                                                                                                               |
| <b>Overall bias</b>                                       | <b>Risk of bias judgement</b>                                                                                                                                                       |                   |                                                      | <b>Low</b>                                       |                                                                                                                                                                                                                               |

|                                                           |                                                                                                                                                                                     |                   |                                                      |                                                  |                                                                                                                                  |
|-----------------------------------------------------------|-------------------------------------------------------------------------------------------------------------------------------------------------------------------------------------|-------------------|------------------------------------------------------|--------------------------------------------------|----------------------------------------------------------------------------------------------------------------------------------|
| <b>Unique ID</b>                                          | 3                                                                                                                                                                                   | <b>Study ID</b>   | Amini 2016, S4                                       | <b>Assessor</b>                                  | JD                                                                                                                               |
| <b>Ref or Label</b>                                       | Amini 2016, S4                                                                                                                                                                      | <b>Aim</b>        | adhering to intervention (the 'per-protocol' effect) | <b>The effect of adhering to intervention...</b> | non-adherence to their assigned intervention by trial participants                                                               |
| <b>Experimental</b>                                       | SnF2                                                                                                                                                                                | <b>Comparator</b> | Negative Control                                     | <b>Source</b>                                    | Conference abstract(s) about the trial                                                                                           |
| <b>Outcome</b>                                            | Number of Bleeding Sites                                                                                                                                                            | <b>Results</b>    | Mean treatment difference                            | <b>Weight</b>                                    | 1                                                                                                                                |
| <b>Domain</b>                                             | <b>Signalling question</b>                                                                                                                                                          |                   |                                                      | <b>Response</b>                                  | <b>Comments</b>                                                                                                                  |
| <b>Bias arising from the randomization process</b>        | 1.1 Was the allocation sequence random?                                                                                                                                             |                   |                                                      | Y                                                | Randomized, controlled, examiner-blinded study to assess changes in dental hypersensitivity and gingivitis over a 2-week period. |
|                                                           | 1.2 Was the allocation sequence concealed until participants were enrolled and assigned to interventions?                                                                           |                   |                                                      | Y                                                |                                                                                                                                  |
|                                                           | 1.3 Did baseline differences between intervention groups suggest a problem with the randomization process?                                                                          |                   |                                                      | N                                                | Baseline # of bleeding sites was balanced across treatment groups                                                                |
|                                                           | <b>Risk of bias judgement</b>                                                                                                                                                       |                   |                                                      | <b>Low</b>                                       |                                                                                                                                  |
| <b>Bias due to deviations from intended interventions</b> | 2.1 Were participants aware of their assigned intervention during the trial?                                                                                                        |                   |                                                      | PY                                               | Text does not say if subject was blind. Only says examiner blind.                                                                |
|                                                           | 2.2 Were carers and people delivering the interventions aware of participants' assigned intervention during the trial?                                                              |                   |                                                      | PY                                               |                                                                                                                                  |
|                                                           | 2.3. [If applicable:] If Y/PY/NI to 2.1 or 2.2: Were important non-protocol interventions balanced across intervention groups?                                                      |                   |                                                      | NA                                               |                                                                                                                                  |
|                                                           | 2.4. [If applicable:] Were there failures in implementing the intervention that could have affected the outcome?                                                                    |                   |                                                      | NA                                               |                                                                                                                                  |
|                                                           | 2.5. [If applicable:] Was there non-adherence to the assigned intervention regimen that could have affected participants' outcomes?                                                 |                   |                                                      | N                                                |                                                                                                                                  |
|                                                           | 2.6. If N/PN/NI to 2.3, or Y/PY/NI to 2.4 or 2.5: Was an appropriate analysis used to estimate the effect of adhering to the intervention?                                          |                   |                                                      | NA                                               |                                                                                                                                  |
|                                                           | <b>Risk of bias judgement</b>                                                                                                                                                       |                   |                                                      | <b>Low</b>                                       |                                                                                                                                  |
| <b>Bias due to missing outcome data</b>                   | 3.1 Were data for this outcome available for all, or nearly all, participants randomized?                                                                                           |                   |                                                      | Y                                                | 69 of 70 subjects randomized completed the study                                                                                 |
|                                                           | 3.2 If N/PN/NI to 3.1: Is there evidence that result was not biased by missing outcome data?                                                                                        |                   |                                                      | NA                                               |                                                                                                                                  |
|                                                           | 3.3 If N/PN to 3.2: Could missingness in the outcome depend on its true value?                                                                                                      |                   |                                                      | NA                                               |                                                                                                                                  |
|                                                           | 3.4 If Y/PY/NI to 3.3: Is it likely that missingness in the outcome depended on its true value?                                                                                     |                   |                                                      | NA                                               |                                                                                                                                  |
|                                                           | <b>Risk of bias judgement</b>                                                                                                                                                       |                   |                                                      | <b>Low</b>                                       |                                                                                                                                  |
| <b>Bias in measurement of the outcome</b>                 | 4.1 Was the method of measuring the outcome inappropriate?                                                                                                                          |                   |                                                      | N                                                | Standard dentistry bleeding site assessments were used                                                                           |
|                                                           | 4.2 Could measurement or ascertainment of the outcome have differed between intervention groups?                                                                                    |                   |                                                      | N                                                |                                                                                                                                  |
|                                                           | 4.3 Were outcome assessors aware of the intervention received by study participants?                                                                                                |                   |                                                      | N                                                | The study was double-blind or examiner-blinded                                                                                   |
|                                                           | 4.4 If Y/PY/NI to 4.3: Could assessment of the outcome have been influenced by knowledge of intervention received?                                                                  |                   |                                                      | NA                                               |                                                                                                                                  |
|                                                           | 4.5 If Y/PY/NI to 4.4: Is it likely that assessment of the outcome was influenced by knowledge of intervention received?                                                            |                   |                                                      | NA                                               |                                                                                                                                  |
|                                                           | <b>Risk of bias judgement</b>                                                                                                                                                       |                   |                                                      | <b>Low</b>                                       |                                                                                                                                  |
| <b>Bias in selection of the reported result</b>           | 5.1 Were the data that produced this result analysed in accordance with a pre-specified analysis plan that was finalized before unblinded outcome data were available for analysis? |                   |                                                      | PY                                               |                                                                                                                                  |
|                                                           | 5.2 ... multiple eligible outcome measurements (e.g. scales, definitions, time points) within the outcome domain?                                                                   |                   |                                                      | N                                                |                                                                                                                                  |
|                                                           | 5.3 ... multiple eligible analyses of the data?                                                                                                                                     |                   |                                                      | N                                                |                                                                                                                                  |
|                                                           | <b>Risk of bias judgement</b>                                                                                                                                                       |                   |                                                      | <b>Low</b>                                       |                                                                                                                                  |
| <b>Overall bias</b>                                       | <b>Risk of bias judgement</b>                                                                                                                                                       |                   |                                                      | <b>Low</b>                                       |                                                                                                                                  |

|                                                           |                                                                                                                                                                                     |                   |                                                      |                                                  |                                                                                                                       |
|-----------------------------------------------------------|-------------------------------------------------------------------------------------------------------------------------------------------------------------------------------------|-------------------|------------------------------------------------------|--------------------------------------------------|-----------------------------------------------------------------------------------------------------------------------|
| <b>Unique ID</b>                                          | 4                                                                                                                                                                                   | <b>Study ID</b>   | Amini, 2018                                          | <b>Assessor</b>                                  | JD                                                                                                                    |
| <b>Ref or Label</b>                                       | Amini, 2018                                                                                                                                                                         | <b>Aim</b>        | adhering to intervention (the 'per-protocol' effect) | <b>The effect of adhering to intervention...</b> | non-adherence to their assigned intervention by trial participants                                                    |
| <b>Experimental</b>                                       | SnF2                                                                                                                                                                                | <b>Comparator</b> | Negative Control                                     | <b>Source</b>                                    | Journal article(s) with results of the trial                                                                          |
| <b>Outcome</b>                                            | Number of Bleeding Sites                                                                                                                                                            | <b>Results</b>    | Mean treatment difference                            | <b>Weight</b>                                    | 1                                                                                                                     |
| <b>Domain</b>                                             | <b>Signalling question</b>                                                                                                                                                          |                   |                                                      | <b>Response</b>                                  | <b>Comments</b>                                                                                                       |
| <b>Bias arising from the randomization process</b>        | 1.1 Was the allocation sequence random?                                                                                                                                             |                   |                                                      | Y                                                | Randomized, controlled, blinded clinical trial. Subjects were dispensed blinded test kits with over-labelled product. |
|                                                           | 1.2 Was the allocation sequence concealed until participants were enrolled and assigned to interventions?                                                                           |                   |                                                      | Y                                                |                                                                                                                       |
|                                                           | 1.3 Did baseline differences between intervention groups suggest a problem with the randomization process?                                                                          |                   |                                                      | N                                                | Baseline number of bleeding sites were balanced across treatment groups                                               |
|                                                           | <b>Risk of bias judgement</b>                                                                                                                                                       |                   |                                                      | <b>Low</b>                                       |                                                                                                                       |
| <b>Bias due to deviations from intended interventions</b> | 2.1 Were participants aware of their assigned intervention during the trial?                                                                                                        |                   |                                                      | N                                                | The assigned paste and brush were dispensed in a blinded kit box                                                      |
|                                                           | 2.2 Were carers and people delivering the interventions aware of participants' assigned intervention during the trial?                                                              |                   |                                                      | N                                                |                                                                                                                       |
|                                                           | 2.3. [If applicable:] If Y/PY/NI to 2.1 or 2.2: Were important non-protocol interventions balanced across intervention groups?                                                      |                   |                                                      | NA                                               |                                                                                                                       |
|                                                           | 2.4. [If applicable:] Were there failures in implementing the intervention that could have affected the outcome?                                                                    |                   |                                                      | NA                                               |                                                                                                                       |
|                                                           | 2.5. [If applicable:] Was there non-adherence to the assigned intervention regimen that could have affected participants' outcomes?                                                 |                   |                                                      | N                                                |                                                                                                                       |
|                                                           | 2.6. If N/PN/NI to 2.3, or Y/PY/NI to 2.4 or 2.5: Was an appropriate analysis used to estimate the effect of adhering to the intervention?                                          |                   |                                                      | NA                                               |                                                                                                                       |
|                                                           | <b>Risk of bias judgement</b>                                                                                                                                                       |                   |                                                      | <b>Low</b>                                       |                                                                                                                       |
| <b>Bias due to missing outcome data</b>                   | 3.1 Were data for this outcome available for all, or nearly all, participants randomized?                                                                                           |                   |                                                      | Y                                                | All 61 subjects randomized completed the study                                                                        |
|                                                           | 3.2 If N/PN/NI to 3.1: Is there evidence that result was not biased by missing outcome data?                                                                                        |                   |                                                      | NA                                               |                                                                                                                       |
|                                                           | 3.3 If N/PN to 3.2: Could missingness in the outcome depend on its true value?                                                                                                      |                   |                                                      | NA                                               |                                                                                                                       |
|                                                           | 3.4 If Y/PY/NI to 3.3: Is it likely that missingness in the outcome depended on its true value?                                                                                     |                   |                                                      | NA                                               |                                                                                                                       |
|                                                           | <b>Risk of bias judgement</b>                                                                                                                                                       |                   |                                                      | <b>Low</b>                                       |                                                                                                                       |
| <b>Bias in measurement of the outcome</b>                 | 4.1 Was the method of measuring the outcome inappropriate?                                                                                                                          |                   |                                                      | N                                                | Standard dentistry bleeding site assessments were used                                                                |
|                                                           | 4.2 Could measurement or ascertainment of the outcome have differed between intervention groups?                                                                                    |                   |                                                      | N                                                |                                                                                                                       |
|                                                           | 4.3 Were outcome assessors aware of the intervention received by study participants?                                                                                                |                   |                                                      | N                                                | The study was double-blind or examiner-blinded                                                                        |
|                                                           | 4.4 If Y/PY/NI to 4.3: Could assessment of the outcome have been influenced by knowledge of intervention received?                                                                  |                   |                                                      | NA                                               |                                                                                                                       |
|                                                           | 4.5 If Y/PY/NI to 4.4: Is it likely that assessment of the outcome was influenced by knowledge of intervention received?                                                            |                   |                                                      | NA                                               |                                                                                                                       |
|                                                           | <b>Risk of bias judgement</b>                                                                                                                                                       |                   |                                                      | <b>Low</b>                                       |                                                                                                                       |
| <b>Bias in selection of the reported result</b>           | 5.1 Were the data that produced this result analysed in accordance with a pre-specified analysis plan that was finalized before unblinded outcome data were available for analysis? |                   |                                                      | PY                                               |                                                                                                                       |
|                                                           | 5.2 ... multiple eligible outcome measurements (e.g. scales, definitions, time points) within the outcome domain?                                                                   |                   |                                                      | N                                                |                                                                                                                       |
|                                                           | 5.3 ... multiple eligible analyses of the data?                                                                                                                                     |                   |                                                      | N                                                |                                                                                                                       |
|                                                           | <b>Risk of bias judgement</b>                                                                                                                                                       |                   |                                                      | <b>Low</b>                                       |                                                                                                                       |
| <b>Overall bias</b>                                       | <b>Risk of bias judgement</b>                                                                                                                                                       |                   |                                                      |                                                  | <b>Low</b>                                                                                                            |

|                                                           |                                                                                                                                                                                     |                   |                                                      |                                                  |                                                                      |
|-----------------------------------------------------------|-------------------------------------------------------------------------------------------------------------------------------------------------------------------------------------|-------------------|------------------------------------------------------|--------------------------------------------------|----------------------------------------------------------------------|
| <b>Unique ID</b>                                          | 5                                                                                                                                                                                   | <b>Study ID</b>   | Goyal 2017, S5                                       | <b>Assessor</b>                                  | JD                                                                   |
| <b>Ref or Label</b>                                       | Goyal 2017, S5                                                                                                                                                                      | <b>Aim</b>        | adhering to intervention (the 'per-protocol' effect) | <b>The effect of adhering to intervention...</b> | non-adherence to their assigned intervention by trial participants   |
| <b>Experimental</b>                                       | SnF2                                                                                                                                                                                | <b>Comparator</b> | Negative Control                                     | <b>Source</b>                                    | Conference abstract(s) about the trial                               |
| <b>Outcome</b>                                            | Number of Bleeding Sites                                                                                                                                                            | <b>Results</b>    | Mean treatment difference                            | <b>Weight</b>                                    | 1                                                                    |
| <b>Domain</b>                                             | <b>Signalling question</b>                                                                                                                                                          |                   |                                                      | <b>Response</b>                                  | <b>Comments</b>                                                      |
| <b>Bias arising from the randomization process</b>        | 1.1 Was the allocation sequence random?                                                                                                                                             |                   |                                                      | Y                                                | Randomized, controlled, 3-treatment, double-blind study              |
|                                                           | 1.2 Was the allocation sequence concealed until participants were enrolled and assigned to interventions?                                                                           |                   |                                                      | Y                                                |                                                                      |
|                                                           | 1.3 Did baseline differences between intervention groups suggest a problem with the randomization process?                                                                          |                   |                                                      | N                                                | Groups were balanced on demographics and baseline gingivitis scores. |
|                                                           | <b>Risk of bias judgement</b>                                                                                                                                                       |                   |                                                      | <b>Low</b>                                       |                                                                      |
| <b>Bias due to deviations from intended interventions</b> | 2.1 Were participants aware of their assigned intervention during the trial?                                                                                                        |                   |                                                      | N                                                | Double-blind                                                         |
|                                                           | 2.2 Were carers and people delivering the interventions aware of participants' assigned intervention during the trial?                                                              |                   |                                                      | N                                                |                                                                      |
|                                                           | 2.3. [If applicable:] If Y/PY/NI to 2.1 or 2.2: Were important non-protocol interventions balanced across intervention groups?                                                      |                   |                                                      | NA                                               |                                                                      |
|                                                           | 2.4. [If applicable:] Were there failures in implementing the intervention that could have affected the outcome?                                                                    |                   |                                                      | NA                                               |                                                                      |
|                                                           | 2.5. [If applicable:] Was there non-adherence to the assigned intervention regimen that could have affected participants' outcomes?                                                 |                   |                                                      | N                                                |                                                                      |
|                                                           | 2.6. If N/PN/NI to 2.3, or Y/PY/NI to 2.4 or 2.5: Was an appropriate analysis used to estimate the effect of adhering to the intervention?                                          |                   |                                                      | NA                                               |                                                                      |
|                                                           | <b>Risk of bias judgement</b>                                                                                                                                                       |                   |                                                      | <b>Low</b>                                       |                                                                      |
| <b>Bias due to missing outcome data</b>                   | 3.1 Were data for this outcome available for all, or nearly all, participants randomized?                                                                                           |                   |                                                      | Y                                                | All 116 subjects randomized completed the study                      |
|                                                           | 3.2 If N/PN/NI to 3.1: Is there evidence that result was not biased by missing outcome data?                                                                                        |                   |                                                      | NA                                               |                                                                      |
|                                                           | 3.3 If N/PN to 3.2: Could missingness in the outcome depend on its true value?                                                                                                      |                   |                                                      | NA                                               |                                                                      |
|                                                           | 3.4 If Y/PY/NI to 3.3: Is it likely that missingness in the outcome depended on its true value?                                                                                     |                   |                                                      | NA                                               |                                                                      |
|                                                           | <b>Risk of bias judgement</b>                                                                                                                                                       |                   |                                                      | <b>Low</b>                                       |                                                                      |
| <b>Bias in measurement of the outcome</b>                 | 4.1 Was the method of measuring the outcome inappropriate?                                                                                                                          |                   |                                                      | N                                                | Standard dentistry bleeding site assessments were used               |
|                                                           | 4.2 Could measurement or ascertainment of the outcome have differed between intervention groups?                                                                                    |                   |                                                      | N                                                |                                                                      |
|                                                           | 4.3 Were outcome assessors aware of the intervention received by study participants?                                                                                                |                   |                                                      | N                                                | The study was double-blind or examiner-blinded                       |
|                                                           | 4.4 If Y/PY/NI to 4.3: Could assessment of the outcome have been influenced by knowledge of intervention received?                                                                  |                   |                                                      | NA                                               |                                                                      |
|                                                           | 4.5 If Y/PY/NI to 4.4: Is it likely that assessment of the outcome was influenced by knowledge of intervention received?                                                            |                   |                                                      | NA                                               |                                                                      |
|                                                           | <b>Risk of bias judgement</b>                                                                                                                                                       |                   |                                                      | <b>Low</b>                                       |                                                                      |
| <b>Bias in selection of the reported result</b>           | 5.1 Were the data that produced this result analysed in accordance with a pre-specified analysis plan that was finalized before unblinded outcome data were available for analysis? |                   |                                                      | PY                                               |                                                                      |
|                                                           | 5.2 ... multiple eligible outcome measurements (e.g. scales, definitions, time points) within the outcome domain?                                                                   |                   |                                                      | N                                                |                                                                      |
|                                                           | 5.3 ... multiple eligible analyses of the data?                                                                                                                                     |                   |                                                      | N                                                |                                                                      |
|                                                           | <b>Risk of bias judgement</b>                                                                                                                                                       |                   |                                                      | <b>Low</b>                                       |                                                                      |
| <b>Overall bias</b>                                       | <b>Risk of bias judgement</b>                                                                                                                                                       |                   |                                                      | <b>Low</b>                                       |                                                                      |

|                                                           |                                                                                                                                                                                     |                   |                                                      |                                                  |                                                                                                                                                                                                   |
|-----------------------------------------------------------|-------------------------------------------------------------------------------------------------------------------------------------------------------------------------------------|-------------------|------------------------------------------------------|--------------------------------------------------|---------------------------------------------------------------------------------------------------------------------------------------------------------------------------------------------------|
| <b>Unique ID</b>                                          | 6                                                                                                                                                                                   | <b>Study ID</b>   | Garcia-Godoy 2015, S6                                | <b>Assessor</b>                                  | JD                                                                                                                                                                                                |
| <b>Ref or Label</b>                                       | Garcia-Godoy 2015, S6                                                                                                                                                               | <b>Aim</b>        | adhering to intervention (the 'per-protocol' effect) | <b>The effect of adhering to intervention...</b> | non-adherence to their assigned intervention by trial participants                                                                                                                                |
| <b>Experimental</b>                                       | SnF2                                                                                                                                                                                | <b>Comparator</b> | Negative Control                                     | <b>Source</b>                                    | Conference abstract(s) about the trial                                                                                                                                                            |
| <b>Outcome</b>                                            | Number of Bleeding Sites                                                                                                                                                            | <b>Results</b>    | Mean treatment difference                            | <b>Weight</b>                                    | 1                                                                                                                                                                                                 |
| <b>Domain</b>                                             | <b>Signalling question</b>                                                                                                                                                          |                   |                                                      | <b>Response</b>                                  | <b>Comments</b>                                                                                                                                                                                   |
| <b>Bias arising from the randomization process</b>        | 1.1 Was the allocation sequence random?                                                                                                                                             |                   |                                                      | Y                                                | Eligible subjects were randomly assigned to one of 2 treatments. Test products were dispensed blinded and over-labeled in blinded test kits<br>Groups were balanced on bleeding sites at baseline |
|                                                           | 1.2 Was the allocation sequence concealed until participants were enrolled and assigned to interventions?                                                                           |                   |                                                      | Y                                                |                                                                                                                                                                                                   |
|                                                           | 1.3 Did baseline differences between intervention groups suggest a problem with the randomization process?                                                                          |                   |                                                      | N                                                |                                                                                                                                                                                                   |
|                                                           | <b>Risk of bias judgement</b>                                                                                                                                                       |                   |                                                      | <b>Low</b>                                       |                                                                                                                                                                                                   |
| <b>Bias due to deviations from intended interventions</b> | 2.1 Were participants aware of their assigned intervention during the trial?                                                                                                        |                   |                                                      | N                                                | Double-blind                                                                                                                                                                                      |
|                                                           | 2.2 Were carers and people delivering the interventions aware of participants' assigned intervention during the trial?                                                              |                   |                                                      | N                                                |                                                                                                                                                                                                   |
|                                                           | 2.3. [If applicable:] If Y/PY/NI to 2.1 or 2.2: Were important non-protocol interventions balanced across intervention groups?                                                      |                   |                                                      | NA                                               |                                                                                                                                                                                                   |
|                                                           | 2.4. [If applicable:] Were there failures in implementing the intervention that could have affected the outcome?                                                                    |                   |                                                      | NA                                               |                                                                                                                                                                                                   |
|                                                           | 2.5. [If applicable:] Was there non-adherence to the assigned intervention regimen that could have affected participants' outcomes?                                                 |                   |                                                      | N                                                |                                                                                                                                                                                                   |
|                                                           | 2.6. If N/PN/NI to 2.3, or Y/PY/NI to 2.4 or 2.5: Was an appropriate analysis used to estimate the effect of adhering to the intervention?                                          |                   |                                                      | NA                                               |                                                                                                                                                                                                   |
|                                                           | <b>Risk of bias judgement</b>                                                                                                                                                       |                   |                                                      | <b>Low</b>                                       |                                                                                                                                                                                                   |
| <b>Bias due to missing outcome data</b>                   | 3.1 Were data for this outcome available for all, or nearly all, participants randomized?                                                                                           |                   |                                                      | Y                                                | 56 of 57 subjects randomized were evaluated in the analysis                                                                                                                                       |
|                                                           | 3.2 If N/PN/NI to 3.1: Is there evidence that result was not biased by missing outcome data?                                                                                        |                   |                                                      | NA                                               |                                                                                                                                                                                                   |
|                                                           | 3.3 If N/PN to 3.2: Could missingness in the outcome depend on its true value?                                                                                                      |                   |                                                      | NA                                               |                                                                                                                                                                                                   |
|                                                           | 3.4 If Y/PY/NI to 3.3: Is it likely that missingness in the outcome depended on its true value?                                                                                     |                   |                                                      | NA                                               |                                                                                                                                                                                                   |
|                                                           | <b>Risk of bias judgement</b>                                                                                                                                                       |                   |                                                      | <b>Low</b>                                       |                                                                                                                                                                                                   |
| <b>Bias in measurement of the outcome</b>                 | 4.1 Was the method of measuring the outcome inappropriate?                                                                                                                          |                   |                                                      | N                                                | Standard dentistry bleeding site assessments were used<br>The study was double-blind or examiner-blinded                                                                                          |
|                                                           | 4.2 Could measurement or ascertainment of the outcome have differed between intervention groups?                                                                                    |                   |                                                      | N                                                |                                                                                                                                                                                                   |
|                                                           | 4.3 Were outcome assessors aware of the intervention received by study participants?                                                                                                |                   |                                                      | N                                                |                                                                                                                                                                                                   |
|                                                           | 4.4 If Y/PY/NI to 4.3: Could assessment of the outcome have been influenced by knowledge of intervention received?                                                                  |                   |                                                      | NA                                               |                                                                                                                                                                                                   |
|                                                           | 4.5 If Y/PY/NI to 4.4: Is it likely that assessment of the outcome was influenced by knowledge of intervention received?                                                            |                   |                                                      | NA                                               |                                                                                                                                                                                                   |
|                                                           | <b>Risk of bias judgement</b>                                                                                                                                                       |                   |                                                      | <b>Low</b>                                       |                                                                                                                                                                                                   |
| <b>Bias in selection of the reported result</b>           | 5.1 Were the data that produced this result analysed in accordance with a pre-specified analysis plan that was finalized before unblinded outcome data were available for analysis? |                   |                                                      | PY                                               |                                                                                                                                                                                                   |
|                                                           | 5.2 ... multiple eligible outcome measurements (e.g. scales, definitions, time points) within the outcome domain?                                                                   |                   |                                                      | N                                                |                                                                                                                                                                                                   |
|                                                           | 5.3 ... multiple eligible analyses of the data?                                                                                                                                     |                   |                                                      | N                                                |                                                                                                                                                                                                   |
|                                                           | <b>Risk of bias judgement</b>                                                                                                                                                       |                   |                                                      | <b>Low</b>                                       |                                                                                                                                                                                                   |
| <b>Overall bias</b>                                       | <b>Risk of bias judgement</b>                                                                                                                                                       |                   |                                                      | <b>Low</b>                                       |                                                                                                                                                                                                   |

|                                                           |                                                                                                                                                                                     |                   |                                                      |                                                  |                                                                    |
|-----------------------------------------------------------|-------------------------------------------------------------------------------------------------------------------------------------------------------------------------------------|-------------------|------------------------------------------------------|--------------------------------------------------|--------------------------------------------------------------------|
| <b>Unique ID</b>                                          | 7                                                                                                                                                                                   | <b>Study ID</b>   | Gerlach & Amini, 2012                                | <b>Assessor</b>                                  | JD                                                                 |
| <b>Ref or Label</b>                                       | Gerlach & Amini, 2012                                                                                                                                                               | <b>Aim</b>        | adhering to intervention (the 'per-protocol' effect) | <b>The effect of adhering to intervention...</b> | non-adherence to their assigned intervention by trial participants |
| <b>Experimental</b>                                       | SnF2                                                                                                                                                                                | <b>Comparator</b> | Negative Control                                     | <b>Source</b>                                    | Journal article(s) with results of the trial                       |
| <b>Outcome</b>                                            | Number of Bleeding Sites                                                                                                                                                            | <b>Results</b>    | Mean treatment difference                            | <b>Weight</b>                                    | 1                                                                  |
| <b>Domain</b>                                             | <b>Signalling question</b>                                                                                                                                                          |                   |                                                      | <b>Response</b>                                  | <b>Comments</b>                                                    |
| <b>Bias arising from the randomization process</b>        | 1.1 Was the allocation sequence random?                                                                                                                                             |                   |                                                      | Y                                                | 3-month, randomized, controlled, blinded study                     |
|                                                           | 1.2 Was the allocation sequence concealed until participants were enrolled and assigned to interventions?                                                                           |                   |                                                      | Y                                                |                                                                    |
|                                                           | 1.3 Did baseline differences between intervention groups suggest a problem with the randomization process?                                                                          |                   |                                                      | N                                                | Groups were balanced on the number of gingival bleeding sites      |
|                                                           | <b>Risk of bias judgement</b>                                                                                                                                                       |                   |                                                      | <b>Low</b>                                       |                                                                    |
| <b>Bias due to deviations from intended interventions</b> | 2.1 Were participants aware of their assigned intervention during the trial?                                                                                                        |                   |                                                      | N                                                | The assigned paste and brush were dispensed in a blinded kit box   |
|                                                           | 2.2 Were carers and people delivering the interventions aware of participants' assigned intervention during the trial?                                                              |                   |                                                      | N                                                |                                                                    |
|                                                           | 2.3. [If applicable:] If Y/PY/NI to 2.1 or 2.2: Were important non-protocol interventions balanced across intervention groups?                                                      |                   |                                                      | NA                                               |                                                                    |
|                                                           | 2.4. [If applicable:] Were there failures in implementing the intervention that could have affected the outcome?                                                                    |                   |                                                      | NA                                               |                                                                    |
|                                                           | 2.5. [If applicable:] Was there non-adherence to the assigned intervention regimen that could have affected participants' outcomes?                                                 |                   |                                                      | N                                                |                                                                    |
|                                                           | 2.6. If N/PN/NI to 2.3, or Y/PY/NI to 2.4 or 2.5: Was an appropriate analysis used to estimate the effect of adhering to the intervention?                                          |                   |                                                      | NA                                               |                                                                    |
|                                                           | <b>Risk of bias judgement</b>                                                                                                                                                       |                   |                                                      | <b>Low</b>                                       |                                                                    |
| <b>Bias due to missing outcome data</b>                   | 3.1 Were data for this outcome available for all, or nearly all, participants randomized?                                                                                           |                   |                                                      | Y                                                | 97 of 100 subjects randomized completed the study                  |
|                                                           | 3.2 If N/PN/NI to 3.1: Is there evidence that result was not biased by missing outcome data?                                                                                        |                   |                                                      | NA                                               |                                                                    |
|                                                           | 3.3 If N/PN to 3.2: Could missingness in the outcome depend on its true value?                                                                                                      |                   |                                                      | NA                                               |                                                                    |
|                                                           | 3.4 If Y/PY/NI to 3.3: Is it likely that missingness in the outcome depended on its true value?                                                                                     |                   |                                                      | NA                                               |                                                                    |
|                                                           | <b>Risk of bias judgement</b>                                                                                                                                                       |                   |                                                      | <b>Low</b>                                       |                                                                    |
| <b>Bias in measurement of the outcome</b>                 | 4.1 Was the method of measuring the outcome inappropriate?                                                                                                                          |                   |                                                      | N                                                | Standard dentistry bleeding site assessments were used             |
|                                                           | 4.2 Could measurement or ascertainment of the outcome have differed between intervention groups?                                                                                    |                   |                                                      | N                                                |                                                                    |
|                                                           | 4.3 Were outcome assessors aware of the intervention received by study participants?                                                                                                |                   |                                                      | N                                                | The study was double-blind or examiner-blinded                     |
|                                                           | 4.4 If Y/PY/NI to 4.3: Could assessment of the outcome have been influenced by knowledge of intervention received?                                                                  |                   |                                                      | NA                                               |                                                                    |
|                                                           | 4.5 If Y/PY/NI to 4.4: Is it likely that assessment of the outcome was influenced by knowledge of intervention received?                                                            |                   |                                                      | NA                                               |                                                                    |
|                                                           | <b>Risk of bias judgement</b>                                                                                                                                                       |                   |                                                      | <b>Low</b>                                       |                                                                    |
| <b>Bias in selection of the reported result</b>           | 5.1 Were the data that produced this result analysed in accordance with a pre-specified analysis plan that was finalized before unblinded outcome data were available for analysis? |                   |                                                      | PY                                               |                                                                    |
|                                                           | 5.2 ... multiple eligible outcome measurements (e.g. scales, definitions, time points) within the outcome domain?                                                                   |                   |                                                      | N                                                |                                                                    |
|                                                           | 5.3 ... multiple eligible analyses of the data?                                                                                                                                     |                   |                                                      | N                                                |                                                                    |
|                                                           | <b>Risk of bias judgement</b>                                                                                                                                                       |                   |                                                      | <b>Low</b>                                       |                                                                    |
| <b>Overall bias</b>                                       | <b>Risk of bias judgement</b>                                                                                                                                                       |                   |                                                      | <b>Low</b>                                       |                                                                    |

|                                                           |                                                                                                                                                                                     |                   |                                                      |                                                  |                                                                             |
|-----------------------------------------------------------|-------------------------------------------------------------------------------------------------------------------------------------------------------------------------------------|-------------------|------------------------------------------------------|--------------------------------------------------|-----------------------------------------------------------------------------|
| <b>Unique ID</b>                                          | 8                                                                                                                                                                                   | <b>Study ID</b>   | Gerlach 2016, S7                                     | <b>Assessor</b>                                  | JD                                                                          |
| <b>Ref or Label</b>                                       | Gerlach 2016, S7                                                                                                                                                                    | <b>Aim</b>        | adhering to intervention (the 'per-protocol' effect) | <b>The effect of adhering to intervention...</b> | non-adherence to their assigned intervention by trial participants          |
| <b>Experimental</b>                                       | SnF2                                                                                                                                                                                | <b>Comparator</b> | Negative Control                                     | <b>Source</b>                                    | Conference abstract(s) about the trial                                      |
| <b>Outcome</b>                                            | Number of Bleeding Sites                                                                                                                                                            | <b>Results</b>    | Mean treatment difference                            | <b>Weight</b>                                    | 1                                                                           |
| <b>Domain</b>                                             | <b>Signalling question</b>                                                                                                                                                          |                   |                                                      | <b>Response</b>                                  | <b>Comments</b>                                                             |
| <b>Bias arising from the randomization process</b>        | 1.1 Was the allocation sequence random?                                                                                                                                             |                   |                                                      | Y                                                | Randomized, controlled, examiner-blind, 2-treatment parallel group study    |
|                                                           | 1.2 Was the allocation sequence concealed until participants were enrolled and assigned to interventions?                                                                           |                   |                                                      | Y                                                |                                                                             |
|                                                           | 1.3 Did baseline differences between intervention groups suggest a problem with the randomization process?                                                                          |                   |                                                      | PN                                               | Treatment groups were well balanced with respect to baseline bleeding sites |
|                                                           | <b>Risk of bias judgement</b>                                                                                                                                                       |                   |                                                      | <b>Low</b>                                       |                                                                             |
| <b>Bias due to deviations from intended interventions</b> | 2.1 Were participants aware of their assigned intervention during the trial?                                                                                                        |                   |                                                      | N                                                | The assigned paste and brush were dispensed in a blinded kit box            |
|                                                           | 2.2 Were carers and people delivering the interventions aware of participants' assigned intervention during the trial?                                                              |                   |                                                      | N                                                |                                                                             |
|                                                           | 2.3. [If applicable:] If Y/PY/NI to 2.1 or 2.2: Were important non-protocol interventions balanced across intervention groups?                                                      |                   |                                                      | NA                                               |                                                                             |
|                                                           | 2.4. [If applicable:] Were there failures in implementing the intervention that could have affected the outcome?                                                                    |                   |                                                      | NA                                               |                                                                             |
|                                                           | 2.5. [If applicable:] Was there non-adherence to the assigned intervention regimen that could have affected participants' outcomes?                                                 |                   |                                                      | N                                                |                                                                             |
|                                                           | 2.6. If N/PN/NI to 2.3, or Y/PY/NI to 2.4 or 2.5: Was an appropriate analysis used to estimate the effect of adhering to the intervention?                                          |                   |                                                      | NA                                               |                                                                             |
|                                                           | <b>Risk of bias judgement</b>                                                                                                                                                       |                   |                                                      | <b>Low</b>                                       |                                                                             |
| <b>Bias due to missing outcome data</b>                   | 3.1 Were data for this outcome available for all, or nearly all, participants randomized?                                                                                           |                   |                                                      | Y                                                | 84 of 91 subjects randomized completed the study                            |
|                                                           | 3.2 If N/PN/NI to 3.1: Is there evidence that result was not biased by missing outcome data?                                                                                        |                   |                                                      | NA                                               |                                                                             |
|                                                           | 3.3 If N/PN to 3.2: Could missingness in the outcome depend on its true value?                                                                                                      |                   |                                                      | NA                                               |                                                                             |
|                                                           | 3.4 If Y/PY/NI to 3.3: Is it likely that missingness in the outcome depended on its true value?                                                                                     |                   |                                                      | NA                                               |                                                                             |
|                                                           | <b>Risk of bias judgement</b>                                                                                                                                                       |                   |                                                      | <b>Low</b>                                       |                                                                             |
| <b>Bias in measurement of the outcome</b>                 | 4.1 Was the method of measuring the outcome inappropriate?                                                                                                                          |                   |                                                      | N                                                | Standard dentistry bleeding site assessments were used                      |
|                                                           | 4.2 Could measurement or ascertainment of the outcome have differed between intervention groups?                                                                                    |                   |                                                      | N                                                |                                                                             |
|                                                           | 4.3 Were outcome assessors aware of the intervention received by study participants?                                                                                                |                   |                                                      | N                                                | The study was double-blind or examiner-blinded                              |
|                                                           | 4.4 If Y/PY/NI to 4.3: Could assessment of the outcome have been influenced by knowledge of intervention received?                                                                  |                   |                                                      | NA                                               |                                                                             |
|                                                           | 4.5 If Y/PY/NI to 4.4: Is it likely that assessment of the outcome was influenced by knowledge of intervention received?                                                            |                   |                                                      | NA                                               |                                                                             |
|                                                           | <b>Risk of bias judgement</b>                                                                                                                                                       |                   |                                                      | <b>Low</b>                                       |                                                                             |
| <b>Bias in selection of the reported result</b>           | 5.1 Were the data that produced this result analysed in accordance with a pre-specified analysis plan that was finalized before unblinded outcome data were available for analysis? |                   |                                                      | PY                                               |                                                                             |
|                                                           | 5.2 ... multiple eligible outcome measurements (e.g. scales, definitions, time points) within the outcome domain?                                                                   |                   |                                                      | N                                                |                                                                             |
|                                                           | 5.3 ... multiple eligible analyses of the data?                                                                                                                                     |                   |                                                      | N                                                |                                                                             |
|                                                           | <b>Risk of bias judgement</b>                                                                                                                                                       |                   |                                                      | <b>Low</b>                                       |                                                                             |
| <b>Overall bias</b>                                       | <b>Risk of bias judgement</b>                                                                                                                                                       |                   |                                                      | <b>Low</b>                                       |                                                                             |



|                                                           |                                                                                                                                                                                     |                   |                                                      |                                                  |                                                                                              |
|-----------------------------------------------------------|-------------------------------------------------------------------------------------------------------------------------------------------------------------------------------------|-------------------|------------------------------------------------------|--------------------------------------------------|----------------------------------------------------------------------------------------------|
| <b>Unique ID</b>                                          | 9                                                                                                                                                                                   | <b>Study ID</b>   | Mallatt, 2007                                        | <b>Assessor</b>                                  | JD                                                                                           |
| <b>Ref or Label</b>                                       | Mallatt, 2007                                                                                                                                                                       | <b>Aim</b>        | adhering to intervention (the 'per-protocol' effect) | <b>The effect of adhering to intervention...</b> | non-adherence to their assigned intervention by trial participants                           |
| <b>Experimental</b>                                       | SnF2                                                                                                                                                                                | <b>Comparator</b> | Negative Control                                     | <b>Source</b>                                    | Journal article(s) with results of the trial                                                 |
| <b>Outcome</b>                                            | Number of Bleeding Sites                                                                                                                                                            | <b>Results</b>    | Mean treatment difference                            | <b>Weight</b>                                    | 1                                                                                            |
| <b>Domain</b>                                             | <b>Signalling question</b>                                                                                                                                                          |                   |                                                      | <b>Response</b>                                  | <b>Comments</b>                                                                              |
| <b>Bias arising from the randomization process</b>        | 1.1 Was the allocation sequence random?                                                                                                                                             |                   |                                                      | Y                                                | Randomized, 6-month, stratified, single-center, double-blind, parallel group, clinical study |
|                                                           | 1.2 Was the allocation sequence concealed until participants were enrolled and assigned to interventions?                                                                           |                   |                                                      | Y                                                |                                                                                              |
|                                                           | 1.3 Did baseline differences between intervention groups suggest a problem with the randomization process?                                                                          |                   |                                                      | N                                                | Treatment groups were well balanced with respect to baseline bleeding sites                  |
|                                                           | <b>Risk of bias judgement</b>                                                                                                                                                       |                   |                                                      | <b>Low</b>                                       |                                                                                              |
| <b>Bias due to deviations from intended interventions</b> | 2.1 Were participants aware of their assigned intervention during the trial?                                                                                                        |                   |                                                      | N                                                | Double-blind                                                                                 |
|                                                           | 2.2 Were carers and people delivering the interventions aware of participants' assigned intervention during the trial?                                                              |                   |                                                      | N                                                |                                                                                              |
|                                                           | 2.3. [If applicable:] If Y/PY/NI to 2.1 or 2.2: Were important non-protocol interventions balanced across intervention groups?                                                      |                   |                                                      | NA                                               |                                                                                              |
|                                                           | 2.4. [If applicable:] Were there failures in implementing the intervention that could have affected the outcome?                                                                    |                   |                                                      | NA                                               |                                                                                              |
|                                                           | 2.5. [If applicable:] Was there non-adherence to the assigned intervention regimen that could have affected participants' outcomes?                                                 |                   |                                                      | N                                                |                                                                                              |
|                                                           | 2.6. If N/PN/NI to 2.3, or Y/PY/NI to 2.4 or 2.5: Was an appropriate analysis used to estimate the effect of adhering to the intervention?                                          |                   |                                                      | NA                                               |                                                                                              |
|                                                           | <b>Risk of bias judgement</b>                                                                                                                                                       |                   |                                                      | <b>Low</b>                                       |                                                                                              |
| <b>Bias due to missing outcome data</b>                   | 3.1 Were data for this outcome available for all, or nearly all, participants randomized?                                                                                           |                   |                                                      | Y                                                | 132 of 140 subjects randomized were evaluated in the analysis                                |
|                                                           | 3.2 If N/PN/NI to 3.1: Is there evidence that result was not biased by missing outcome data?                                                                                        |                   |                                                      | NA                                               |                                                                                              |
|                                                           | 3.3 If N/PN to 3.2: Could missingness in the outcome depend on its true value?                                                                                                      |                   |                                                      | NA                                               |                                                                                              |
|                                                           | 3.4 If Y/PY/NI to 3.3: Is it likely that missingness in the outcome depended on its true value?                                                                                     |                   |                                                      | NA                                               |                                                                                              |
|                                                           | <b>Risk of bias judgement</b>                                                                                                                                                       |                   |                                                      | <b>Low</b>                                       |                                                                                              |
| <b>Bias in measurement of the outcome</b>                 | 4.1 Was the method of measuring the outcome inappropriate?                                                                                                                          |                   |                                                      | N                                                | Standard dentistry bleeding site assessments were used                                       |
|                                                           | 4.2 Could measurement or ascertainment of the outcome have differed between intervention groups?                                                                                    |                   |                                                      | N                                                |                                                                                              |
|                                                           | 4.3 Were outcome assessors aware of the intervention received by study participants?                                                                                                |                   |                                                      | N                                                | The study was double-blind or examiner-blinded                                               |
|                                                           | 4.4 If Y/PY/NI to 4.3: Could assessment of the outcome have been influenced by knowledge of intervention received?                                                                  |                   |                                                      | NA                                               |                                                                                              |
|                                                           | 4.5 If Y/PY/NI to 4.4: Is it likely that assessment of the outcome was influenced by knowledge of intervention received?                                                            |                   |                                                      | NA                                               |                                                                                              |
|                                                           | <b>Risk of bias judgement</b>                                                                                                                                                       |                   |                                                      | <b>Low</b>                                       |                                                                                              |
| <b>Bias in selection of the reported result</b>           | 5.1 Were the data that produced this result analysed in accordance with a pre-specified analysis plan that was finalized before unblinded outcome data were available for analysis? |                   |                                                      | PY                                               |                                                                                              |
|                                                           | 5.2 ... multiple eligible outcome measurements (e.g. scales, definitions, time points) within the outcome domain?                                                                   |                   |                                                      | N                                                |                                                                                              |
|                                                           | 5.3 ... multiple eligible analyses of the data?                                                                                                                                     |                   |                                                      | N                                                |                                                                                              |
|                                                           | <b>Risk of bias judgement</b>                                                                                                                                                       |                   |                                                      | <b>Low</b>                                       |                                                                                              |
| <b>Overall bias</b>                                       | <b>Risk of bias judgement</b>                                                                                                                                                       |                   |                                                      | <b>Low</b>                                       |                                                                                              |

|                                                           |                                                                                                                                                                                     |                   |                                                      |                                                  |                                                                                              |
|-----------------------------------------------------------|-------------------------------------------------------------------------------------------------------------------------------------------------------------------------------------|-------------------|------------------------------------------------------|--------------------------------------------------|----------------------------------------------------------------------------------------------|
| <b>Unique ID</b>                                          | 10                                                                                                                                                                                  | <b>Study ID</b>   | Mankodi, 2005                                        | <b>Assessor</b>                                  | JD                                                                                           |
| <b>Ref or Label</b>                                       | Mankodi, 2005                                                                                                                                                                       | <b>Aim</b>        | adhering to intervention (the 'per-protocol' effect) | <b>The effect of adhering to intervention...</b> | non-adherence to their assigned intervention by trial participants                           |
| <b>Experimental</b>                                       | SnF2                                                                                                                                                                                | <b>Comparator</b> | Negative Control                                     | <b>Source</b>                                    | Journal article(s) with results of the trial                                                 |
| <b>Outcome</b>                                            | Number of Bleeding Sites                                                                                                                                                            | <b>Results</b>    | Mean treatment difference                            | <b>Weight</b>                                    | 1                                                                                            |
| <b>Domain</b>                                             | <b>Signalling question</b>                                                                                                                                                          |                   |                                                      | <b>Response</b>                                  | <b>Comments</b>                                                                              |
| <b>Bias arising from the randomization process</b>        | 1.1 Was the allocation sequence random?                                                                                                                                             |                   |                                                      | Y                                                | Randomized, 6-month, stratified, single-center, double-blind, parallel group, clinical study |
|                                                           | 1.2 Was the allocation sequence concealed until participants were enrolled and assigned to interventions?                                                                           |                   |                                                      | Y                                                |                                                                                              |
|                                                           | 1.3 Did baseline differences between intervention groups suggest a problem with the randomization process?                                                                          |                   |                                                      | N                                                | Treatment groups were well balanced with respect to baseline bleeding sites                  |
|                                                           | <b>Risk of bias judgement</b>                                                                                                                                                       |                   |                                                      | <b>Low</b>                                       |                                                                                              |
| <b>Bias due to deviations from intended interventions</b> | 2.1 Were participants aware of their assigned intervention during the trial?                                                                                                        |                   |                                                      | N                                                | Double-blind                                                                                 |
|                                                           | 2.2 Were carers and people delivering the interventions aware of participants' assigned intervention during the trial?                                                              |                   |                                                      | N                                                |                                                                                              |
|                                                           | 2.3. [If applicable:] If Y/PY/NI to 2.1 or 2.2: Were important non-protocol interventions balanced across intervention groups?                                                      |                   |                                                      | NA                                               |                                                                                              |
|                                                           | 2.4. [If applicable:] Were there failures in implementing the intervention that could have affected the outcome?                                                                    |                   |                                                      | NA                                               |                                                                                              |
|                                                           | 2.5. [If applicable:] Was there non-adherence to the assigned intervention regimen that could have affected participants' outcomes?                                                 |                   |                                                      | N                                                |                                                                                              |
|                                                           | 2.6. If N/PN/NI to 2.3, or Y/PY/NI to 2.4 or 2.5: Was an appropriate analysis used to estimate the effect of adhering to the intervention?                                          |                   |                                                      | NA                                               |                                                                                              |
|                                                           | <b>Risk of bias judgement</b>                                                                                                                                                       |                   |                                                      | <b>Low</b>                                       |                                                                                              |
| <b>Bias due to missing outcome data</b>                   | 3.1 Were data for this outcome available for all, or nearly all, participants randomized?                                                                                           |                   |                                                      | Y                                                | 133 of 143 subjects randomized were evaluated in the analysis                                |
|                                                           | 3.2 If N/PN/NI to 3.1: Is there evidence that result was not biased by missing outcome data?                                                                                        |                   |                                                      | NA                                               |                                                                                              |
|                                                           | 3.3 If N/PN to 3.2: Could missingness in the outcome depend on its true value?                                                                                                      |                   |                                                      | NA                                               |                                                                                              |
|                                                           | 3.4 If Y/PY/NI to 3.3: Is it likely that missingness in the outcome depended on its true value?                                                                                     |                   |                                                      | NA                                               |                                                                                              |
|                                                           | <b>Risk of bias judgement</b>                                                                                                                                                       |                   |                                                      | <b>Low</b>                                       |                                                                                              |
| <b>Bias in measurement of the outcome</b>                 | 4.1 Was the method of measuring the outcome inappropriate?                                                                                                                          |                   |                                                      | N                                                | Standard dentistry bleeding site assessments were used                                       |
|                                                           | 4.2 Could measurement or ascertainment of the outcome have differed between intervention groups?                                                                                    |                   |                                                      | N                                                |                                                                                              |
|                                                           | 4.3 Were outcome assessors aware of the intervention received by study participants?                                                                                                |                   |                                                      | N                                                | The study was double-blind or examiner-blinded                                               |
|                                                           | 4.4 If Y/PY/NI to 4.3: Could assessment of the outcome have been influenced by knowledge of intervention received?                                                                  |                   |                                                      | NA                                               |                                                                                              |
|                                                           | 4.5 If Y/PY/NI to 4.4: Is it likely that assessment of the outcome was influenced by knowledge of intervention received?                                                            |                   |                                                      | NA                                               |                                                                                              |
|                                                           | <b>Risk of bias judgement</b>                                                                                                                                                       |                   |                                                      | <b>Low</b>                                       |                                                                                              |
| <b>Bias in selection of the reported result</b>           | 5.1 Were the data that produced this result analysed in accordance with a pre-specified analysis plan that was finalized before unblinded outcome data were available for analysis? |                   |                                                      | PY                                               |                                                                                              |
|                                                           | 5.2 ... multiple eligible outcome measurements (e.g. scales, definitions, time points) within the outcome domain?                                                                   |                   |                                                      | N                                                |                                                                                              |
|                                                           | 5.3 ... multiple eligible analyses of the data?                                                                                                                                     |                   |                                                      | N                                                |                                                                                              |
|                                                           | <b>Risk of bias judgement</b>                                                                                                                                                       |                   |                                                      | <b>Low</b>                                       |                                                                                              |
| <b>Overall bias</b>                                       | <b>Risk of bias judgement</b>                                                                                                                                                       |                   |                                                      | <b>Low</b>                                       |                                                                                              |

|                                                           |                                                                                                                                                                                     |                   |                                                      |                                                  |                                                                             |
|-----------------------------------------------------------|-------------------------------------------------------------------------------------------------------------------------------------------------------------------------------------|-------------------|------------------------------------------------------|--------------------------------------------------|-----------------------------------------------------------------------------|
| <b>Unique ID</b>                                          | 11                                                                                                                                                                                  | <b>Study ID</b>   | McClanahan, 1997                                     | <b>Assessor</b>                                  | JD                                                                          |
| <b>Ref or Label</b>                                       | McClanahan, 1997                                                                                                                                                                    | <b>Aim</b>        | adhering to intervention (the 'per-protocol' effect) | <b>The effect of adhering to intervention...</b> | non-adherence to their assigned intervention by trial participants          |
| <b>Experimental</b>                                       | SnF2                                                                                                                                                                                | <b>Comparator</b> | Negative Control                                     | <b>Source</b>                                    | Journal article(s) with results of the trial                                |
| <b>Outcome</b>                                            | Number of Bleeding Sites                                                                                                                                                            | <b>Results</b>    | Mean treatment difference                            | <b>Weight</b>                                    | 1                                                                           |
| <b>Domain</b>                                             | <b>Signalling question</b>                                                                                                                                                          |                   |                                                      | <b>Response</b>                                  | <b>Comments</b>                                                             |
| <b>Bias arising from the randomization process</b>        | 1.1 Was the allocation sequence random?                                                                                                                                             |                   |                                                      | Y                                                | Parallel-group, double-blind, placebo-controlled study                      |
|                                                           | 1.2 Was the allocation sequence concealed until participants were enrolled and assigned to interventions?                                                                           |                   |                                                      | Y                                                |                                                                             |
|                                                           | 1.3 Did baseline differences between intervention groups suggest a problem with the randomization process?                                                                          |                   |                                                      | N                                                | Treatment groups were well balanced with respect to baseline bleeding sites |
|                                                           | <b>Risk of bias judgement</b>                                                                                                                                                       |                   |                                                      | <b>Low</b>                                       |                                                                             |
| <b>Bias due to deviations from intended interventions</b> | 2.1 Were participants aware of their assigned intervention during the trial?                                                                                                        |                   |                                                      | N                                                | Double-blind                                                                |
|                                                           | 2.2 Were carers and people delivering the interventions aware of participants' assigned intervention during the trial?                                                              |                   |                                                      | N                                                |                                                                             |
|                                                           | 2.3. [If applicable:] If Y/PY/NI to 2.1 or 2.2: Were important non-protocol interventions balanced across intervention groups?                                                      |                   |                                                      | NA                                               |                                                                             |
|                                                           | 2.4. [If applicable:] Were there failures in implementing the intervention that could have affected the outcome?                                                                    |                   |                                                      | NA                                               |                                                                             |
|                                                           | 2.5. [If applicable:] Was there non-adherence to the assigned intervention regimen that could have affected participants' outcomes?                                                 |                   |                                                      | N                                                |                                                                             |
|                                                           | 2.6. If N/PN/NI to 2.3, or Y/PY/NI to 2.4 or 2.5: Was an appropriate analysis used to estimate the effect of adhering to the intervention?                                          |                   |                                                      | NA                                               |                                                                             |
|                                                           | <b>Risk of bias judgement</b>                                                                                                                                                       |                   |                                                      | <b>Low</b>                                       |                                                                             |
| <b>Bias due to missing outcome data</b>                   | 3.1 Were data for this outcome available for all, or nearly all, participants randomized?                                                                                           |                   |                                                      | Y                                                | 546 of 570 subjects randomized were evaluated in the analysis               |
|                                                           | 3.2 If N/PN/NI to 3.1: Is there evidence that result was not biased by missing outcome data?                                                                                        |                   |                                                      | NA                                               |                                                                             |
|                                                           | 3.3 If N/PN to 3.2: Could missingness in the outcome depend on its true value?                                                                                                      |                   |                                                      | NA                                               |                                                                             |
|                                                           | 3.4 If Y/PY/NI to 3.3: Is it likely that missingness in the outcome depended on its true value?                                                                                     |                   |                                                      | NA                                               |                                                                             |
|                                                           | <b>Risk of bias judgement</b>                                                                                                                                                       |                   |                                                      | <b>Low</b>                                       |                                                                             |
| <b>Bias in measurement of the outcome</b>                 | 4.1 Was the method of measuring the outcome inappropriate?                                                                                                                          |                   |                                                      | N                                                | Standard dentistry bleeding site assessments were used                      |
|                                                           | 4.2 Could measurement or ascertainment of the outcome have differed between intervention groups?                                                                                    |                   |                                                      | N                                                |                                                                             |
|                                                           | 4.3 Were outcome assessors aware of the intervention received by study participants?                                                                                                |                   |                                                      | N                                                | The study was double-blind or examiner-blinded                              |
|                                                           | 4.4 If Y/PY/NI to 4.3: Could assessment of the outcome have been influenced by knowledge of intervention received?                                                                  |                   |                                                      | NA                                               |                                                                             |
|                                                           | 4.5 If Y/PY/NI to 4.4: Is it likely that assessment of the outcome was influenced by knowledge of intervention received?                                                            |                   |                                                      | NA                                               |                                                                             |
|                                                           | <b>Risk of bias judgement</b>                                                                                                                                                       |                   |                                                      | <b>Low</b>                                       |                                                                             |
| <b>Bias in selection of the reported result</b>           | 5.1 Were the data that produced this result analysed in accordance with a pre-specified analysis plan that was finalized before unblinded outcome data were available for analysis? |                   |                                                      | PY                                               |                                                                             |
|                                                           | 5.2 ... multiple eligible outcome measurements (e.g. scales, definitions, time points) within the outcome domain?                                                                   |                   |                                                      | N                                                |                                                                             |
|                                                           | 5.3 ... multiple eligible analyses of the data?                                                                                                                                     |                   |                                                      | N                                                |                                                                             |
|                                                           | <b>Risk of bias judgement</b>                                                                                                                                                       |                   |                                                      | <b>Low</b>                                       |                                                                             |
| <b>Overall bias</b>                                       | <b>Risk of bias judgement</b>                                                                                                                                                       |                   |                                                      | <b>Low</b>                                       |                                                                             |

|                                                           |                                                                                                                                                                                     |                   |                                                      |                                                  |                                                                             |
|-----------------------------------------------------------|-------------------------------------------------------------------------------------------------------------------------------------------------------------------------------------|-------------------|------------------------------------------------------|--------------------------------------------------|-----------------------------------------------------------------------------|
| <b>Unique ID</b>                                          | 12                                                                                                                                                                                  | <b>Study ID</b>   | Beiswanger, 1995                                     | <b>Assessor</b>                                  | JD                                                                          |
| <b>Ref or Label</b>                                       | Beiswanger, 1995                                                                                                                                                                    | <b>Aim</b>        | adhering to intervention (the 'per-protocol' effect) | <b>The effect of adhering to intervention...</b> | non-adherence to their assigned intervention by trial participants          |
| <b>Experimental</b>                                       | SnF2                                                                                                                                                                                | <b>Comparator</b> | Negative Control                                     | <b>Source</b>                                    | Journal article(s) with results of the trial                                |
| <b>Outcome</b>                                            | Number of Bleeding Sites                                                                                                                                                            | <b>Results</b>    | Mean treatment difference                            | <b>Weight</b>                                    | 1                                                                           |
| <b>Domain</b>                                             | <b>Signalling question</b>                                                                                                                                                          |                   |                                                      | <b>Response</b>                                  | <b>Comments</b>                                                             |
| <b>Bias arising from the randomization process</b>        | 1.1 Was the allocation sequence random?                                                                                                                                             |                   |                                                      | Y                                                | Parallel-group, double-blind, placebo-controlled, 6-month study             |
|                                                           | 1.2 Was the allocation sequence concealed until participants were enrolled and assigned to interventions?                                                                           |                   |                                                      | Y                                                |                                                                             |
|                                                           | 1.3 Did baseline differences between intervention groups suggest a problem with the randomization process?                                                                          |                   |                                                      | N                                                | Treatment groups were well balanced with respect to baseline bleeding sites |
|                                                           | <b>Risk of bias judgement</b>                                                                                                                                                       |                   |                                                      | <b>Low</b>                                       |                                                                             |
| <b>Bias due to deviations from intended interventions</b> | 2.1 Were participants aware of their assigned intervention during the trial?                                                                                                        |                   |                                                      | N                                                | Double-blind                                                                |
|                                                           | 2.2 Were carers and people delivering the interventions aware of participants' assigned intervention during the trial?                                                              |                   |                                                      | N                                                |                                                                             |
|                                                           | 2.3. [If applicable:] If Y/PY/NI to 2.1 or 2.2: Were important non-protocol interventions balanced across intervention groups?                                                      |                   |                                                      | NA                                               |                                                                             |
|                                                           | 2.4. [If applicable:] Were there failures in implementing the intervention that could have affected the outcome?                                                                    |                   |                                                      | NA                                               |                                                                             |
|                                                           | 2.5. [If applicable:] Was there non-adherence to the assigned intervention regimen that could have affected participants' outcomes?                                                 |                   |                                                      | N                                                |                                                                             |
|                                                           | 2.6. If N/PN/NI to 2.3, or Y/PY/NI to 2.4 or 2.5: Was an appropriate analysis used to estimate the effect of adhering to the intervention?                                          |                   |                                                      | NA                                               |                                                                             |
|                                                           | <b>Risk of bias judgement</b>                                                                                                                                                       |                   |                                                      | <b>Low</b>                                       |                                                                             |
| <b>Bias due to missing outcome data</b>                   | 3.1 Were data for this outcome available for all, or nearly all, participants randomized?                                                                                           |                   |                                                      | Y                                                | 542 of 620 subjects randomized were evaluated in the analysis               |
|                                                           | 3.2 If N/PN/NI to 3.1: Is there evidence that result was not biased by missing outcome data?                                                                                        |                   |                                                      | NA                                               |                                                                             |
|                                                           | 3.3 If N/PN to 3.2: Could missingness in the outcome depend on its true value?                                                                                                      |                   |                                                      | NA                                               |                                                                             |
|                                                           | 3.4 If Y/PY/NI to 3.3: Is it likely that missingness in the outcome depended on its true value?                                                                                     |                   |                                                      | NA                                               |                                                                             |
|                                                           | <b>Risk of bias judgement</b>                                                                                                                                                       |                   |                                                      | <b>Low</b>                                       |                                                                             |
| <b>Bias in measurement of the outcome</b>                 | 4.1 Was the method of measuring the outcome inappropriate?                                                                                                                          |                   |                                                      | N                                                | Standard dentistry bleeding site assessments were used                      |
|                                                           | 4.2 Could measurement or ascertainment of the outcome have differed between intervention groups?                                                                                    |                   |                                                      | N                                                |                                                                             |
|                                                           | 4.3 Were outcome assessors aware of the intervention received by study participants?                                                                                                |                   |                                                      | N                                                | The study was double-blind or examiner-blinded                              |
|                                                           | 4.4 If Y/PY/NI to 4.3: Could assessment of the outcome have been influenced by knowledge of intervention received?                                                                  |                   |                                                      | NA                                               |                                                                             |
|                                                           | 4.5 If Y/PY/NI to 4.4: Is it likely that assessment of the outcome was influenced by knowledge of intervention received?                                                            |                   |                                                      | NA                                               |                                                                             |
|                                                           | <b>Risk of bias judgement</b>                                                                                                                                                       |                   |                                                      | <b>Low</b>                                       |                                                                             |
| <b>Bias in selection of the reported result</b>           | 5.1 Were the data that produced this result analysed in accordance with a pre-specified analysis plan that was finalized before unblinded outcome data were available for analysis? |                   |                                                      | PY                                               |                                                                             |
|                                                           | 5.2 ... multiple eligible outcome measurements (e.g. scales, definitions, time points) within the outcome domain?                                                                   |                   |                                                      | N                                                |                                                                             |
|                                                           | 5.3 ... multiple eligible analyses of the data?                                                                                                                                     |                   |                                                      | N                                                |                                                                             |
|                                                           | <b>Risk of bias judgement</b>                                                                                                                                                       |                   |                                                      | <b>Low</b>                                       |                                                                             |
| <b>Overall bias</b>                                       | <b>Risk of bias judgement</b>                                                                                                                                                       |                   |                                                      | <b>Low</b>                                       |                                                                             |

|                                                           |                                                                                                                                                                                     |                   |                                                      |                                                  |                                                                             |
|-----------------------------------------------------------|-------------------------------------------------------------------------------------------------------------------------------------------------------------------------------------|-------------------|------------------------------------------------------|--------------------------------------------------|-----------------------------------------------------------------------------|
| <b>Unique ID</b>                                          | 13                                                                                                                                                                                  | <b>Study ID</b>   | He, 2017b                                            | <b>Assessor</b>                                  | JD                                                                          |
| <b>Ref or Label</b>                                       | He, 2017b                                                                                                                                                                           | <b>Aim</b>        | adhering to intervention (the 'per-protocol' effect) | <b>The effect of adhering to intervention...</b> | non-adherence to their assigned intervention by trial participants          |
| <b>Experimental</b>                                       | SnF2                                                                                                                                                                                | <b>Comparator</b> | Positive Control                                     | <b>Source</b>                                    | Journal article(s) with results of the trial                                |
| <b>Outcome</b>                                            | Number of Bleeding Sites                                                                                                                                                            | <b>Results</b>    | Mean treatment difference                            | <b>Weight</b>                                    | 1                                                                           |
| <b>Domain</b>                                             | <b>Signalling question</b>                                                                                                                                                          |                   |                                                      | <b>Response</b>                                  | <b>Comments</b>                                                             |
| <b>Bias arising from the randomization process</b>        | 1.1 Was the allocation sequence random?                                                                                                                                             |                   |                                                      | Y                                                | 2-month, randomized, double-blind, parallel group study                     |
|                                                           | 1.2 Was the allocation sequence concealed until participants were enrolled and assigned to interventions?                                                                           |                   |                                                      | Y                                                |                                                                             |
|                                                           | 1.3 Did baseline differences between intervention groups suggest a problem with the randomization process?                                                                          |                   |                                                      | N                                                | Treatment groups were well balanced with respect to baseline bleeding sites |
|                                                           | <b>Risk of bias judgement</b>                                                                                                                                                       |                   |                                                      | <b>Low</b>                                       |                                                                             |
| <b>Bias due to deviations from intended interventions</b> | 2.1 Were participants aware of their assigned intervention during the trial?                                                                                                        |                   |                                                      | N                                                | Double-blind                                                                |
|                                                           | 2.2 Were carers and people delivering the interventions aware of participants' assigned intervention during the trial?                                                              |                   |                                                      | N                                                |                                                                             |
|                                                           | 2.3. [If applicable:] If Y/PY/NI to 2.1 or 2.2: Were important non-protocol interventions balanced across intervention groups?                                                      |                   |                                                      | NA                                               |                                                                             |
|                                                           | 2.4. [If applicable:] Were there failures in implementing the intervention that could have affected the outcome?                                                                    |                   |                                                      | NA                                               |                                                                             |
|                                                           | 2.5. [If applicable:] Was there non-adherence to the assigned intervention regimen that could have affected participants' outcomes?                                                 |                   |                                                      | N                                                |                                                                             |
|                                                           | 2.6. If N/PN/NI to 2.3, or Y/PY/NI to 2.4 or 2.5: Was an appropriate analysis used to estimate the effect of adhering to the intervention?                                          |                   |                                                      | NA                                               |                                                                             |
|                                                           | <b>Risk of bias judgement</b>                                                                                                                                                       |                   |                                                      | <b>Low</b>                                       |                                                                             |
| <b>Bias due to missing outcome data</b>                   | 3.1 Were data for this outcome available for all, or nearly all, participants randomized?                                                                                           |                   |                                                      | Y                                                | 197 of 200 subjects randomized were evaluated in the analysis               |
|                                                           | 3.2 If N/PN/NI to 3.1: Is there evidence that result was not biased by missing outcome data?                                                                                        |                   |                                                      | NA                                               |                                                                             |
|                                                           | 3.3 If N/PN to 3.2: Could missingness in the outcome depend on its true value?                                                                                                      |                   |                                                      | NA                                               |                                                                             |
|                                                           | 3.4 If Y/PY/NI to 3.3: Is it likely that missingness in the outcome depended on its true value?                                                                                     |                   |                                                      | NA                                               |                                                                             |
|                                                           | <b>Risk of bias judgement</b>                                                                                                                                                       |                   |                                                      | <b>Low</b>                                       |                                                                             |
| <b>Bias in measurement of the outcome</b>                 | 4.1 Was the method of measuring the outcome inappropriate?                                                                                                                          |                   |                                                      | N                                                | Standard dentistry bleeding site assessments were used                      |
|                                                           | 4.2 Could measurement or ascertainment of the outcome have differed between intervention groups?                                                                                    |                   |                                                      | N                                                |                                                                             |
|                                                           | 4.3 Were outcome assessors aware of the intervention received by study participants?                                                                                                |                   |                                                      | N                                                | The study was double-blind or examiner-blinded                              |
|                                                           | 4.4 If Y/PY/NI to 4.3: Could assessment of the outcome have been influenced by knowledge of intervention received?                                                                  |                   |                                                      | NA                                               |                                                                             |
|                                                           | 4.5 If Y/PY/NI to 4.4: Is it likely that assessment of the outcome was influenced by knowledge of intervention received?                                                            |                   |                                                      | NA                                               |                                                                             |
|                                                           | <b>Risk of bias judgement</b>                                                                                                                                                       |                   |                                                      | <b>Low</b>                                       |                                                                             |
| <b>Bias in selection of the reported result</b>           | 5.1 Were the data that produced this result analysed in accordance with a pre-specified analysis plan that was finalized before unblinded outcome data were available for analysis? |                   |                                                      | PY                                               |                                                                             |
|                                                           | 5.2 ... multiple eligible outcome measurements (e.g. scales, definitions, time points) within the outcome domain?                                                                   |                   |                                                      | N                                                |                                                                             |
|                                                           | 5.3 ... multiple eligible analyses of the data?                                                                                                                                     |                   |                                                      | N                                                |                                                                             |
|                                                           | <b>Risk of bias judgement</b>                                                                                                                                                       |                   |                                                      | <b>Low</b>                                       |                                                                             |
| <b>Overall bias</b>                                       | <b>Risk of bias judgement</b>                                                                                                                                                       |                   |                                                      | <b>Low</b>                                       |                                                                             |

|                                                           |                                                                                                                                                                                     |                   |                                                      |                                                  |                                                                             |
|-----------------------------------------------------------|-------------------------------------------------------------------------------------------------------------------------------------------------------------------------------------|-------------------|------------------------------------------------------|--------------------------------------------------|-----------------------------------------------------------------------------|
| <b>Unique ID</b>                                          | 14                                                                                                                                                                                  | <b>Study ID</b>   | He, 2013b                                            | <b>Assessor</b>                                  | JD                                                                          |
| <b>Ref or Label</b>                                       | He, 2013b                                                                                                                                                                           | <b>Aim</b>        | adhering to intervention (the 'per-protocol' effect) | <b>The effect of adhering to intervention...</b> | non-adherence to their assigned intervention by trial participants          |
| <b>Experimental</b>                                       | SnF2                                                                                                                                                                                | <b>Comparator</b> | Positive Control                                     | <b>Source</b>                                    | Journal article(s) with results of the trial                                |
| <b>Outcome</b>                                            | Number of Bleeding Sites                                                                                                                                                            | <b>Results</b>    | Mean treatment difference                            | <b>Weight</b>                                    | 1                                                                           |
| <b>Domain</b>                                             | <b>Signalling question</b>                                                                                                                                                          |                   |                                                      | <b>Response</b>                                  | <b>Comments</b>                                                             |
| <b>Bias arising from the randomization process</b>        | 1.1 Was the allocation sequence random?                                                                                                                                             |                   |                                                      | Y                                                | 2-month, randomized, double-blind, parallel group study                     |
|                                                           | 1.2 Was the allocation sequence concealed until participants were enrolled and assigned to interventions?                                                                           |                   |                                                      | Y                                                |                                                                             |
|                                                           | 1.3 Did baseline differences between intervention groups suggest a problem with the randomization process?                                                                          |                   |                                                      | N                                                | Treatment groups were well balanced with respect to baseline bleeding sites |
|                                                           | <b>Risk of bias judgement</b>                                                                                                                                                       |                   |                                                      | <b>Low</b>                                       |                                                                             |
| <b>Bias due to deviations from intended interventions</b> | 2.1 Were participants aware of their assigned intervention during the trial?                                                                                                        |                   |                                                      | N                                                | Double-blind                                                                |
|                                                           | 2.2 Were carers and people delivering the interventions aware of participants' assigned intervention during the trial?                                                              |                   |                                                      | N                                                |                                                                             |
|                                                           | 2.3. [If applicable:] If Y/PY/NI to 2.1 or 2.2: Were important non-protocol interventions balanced across intervention groups?                                                      |                   |                                                      | NA                                               |                                                                             |
|                                                           | 2.4. [If applicable:] Were there failures in implementing the intervention that could have affected the outcome?                                                                    |                   |                                                      | NA                                               |                                                                             |
|                                                           | 2.5. [If applicable:] Was there non-adherence to the assigned intervention regimen that could have affected participants' outcomes?                                                 |                   |                                                      | N                                                |                                                                             |
|                                                           | 2.6. If N/PN/NI to 2.3, or Y/PY/NI to 2.4 or 2.5: Was an appropriate analysis used to estimate the effect of adhering to the intervention?                                          |                   |                                                      | NA                                               |                                                                             |
|                                                           | <b>Risk of bias judgement</b>                                                                                                                                                       |                   |                                                      | <b>Low</b>                                       |                                                                             |
| <b>Bias due to missing outcome data</b>                   | 3.1 Were data for this outcome available for all, or nearly all, participants randomized?                                                                                           |                   |                                                      | Y                                                | 148 of 150 subjects randomized were evaluated in the analysis               |
|                                                           | 3.2 If N/PN/NI to 3.1: Is there evidence that result was not biased by missing outcome data?                                                                                        |                   |                                                      | NA                                               |                                                                             |
|                                                           | 3.3 If N/PN to 3.2: Could missingness in the outcome depend on its true value?                                                                                                      |                   |                                                      | NA                                               |                                                                             |
|                                                           | 3.4 If Y/PY/NI to 3.3: Is it likely that missingness in the outcome depended on its true value?                                                                                     |                   |                                                      | NA                                               |                                                                             |
|                                                           | <b>Risk of bias judgement</b>                                                                                                                                                       |                   |                                                      | <b>Low</b>                                       |                                                                             |
| <b>Bias in measurement of the outcome</b>                 | 4.1 Was the method of measuring the outcome inappropriate?                                                                                                                          |                   |                                                      | N                                                | Standard dentistry bleeding site assessments were used                      |
|                                                           | 4.2 Could measurement or ascertainment of the outcome have differed between intervention groups?                                                                                    |                   |                                                      | N                                                |                                                                             |
|                                                           | 4.3 Were outcome assessors aware of the intervention received by study participants?                                                                                                |                   |                                                      | N                                                | The study was double-blind or examiner-blinded                              |
|                                                           | 4.4 If Y/PY/NI to 4.3: Could assessment of the outcome have been influenced by knowledge of intervention received?                                                                  |                   |                                                      | NA                                               |                                                                             |
|                                                           | 4.5 If Y/PY/NI to 4.4: Is it likely that assessment of the outcome was influenced by knowledge of intervention received?                                                            |                   |                                                      | NA                                               |                                                                             |
|                                                           | <b>Risk of bias judgement</b>                                                                                                                                                       |                   |                                                      | <b>Low</b>                                       |                                                                             |
| <b>Bias in selection of the reported result</b>           | 5.1 Were the data that produced this result analysed in accordance with a pre-specified analysis plan that was finalized before unblinded outcome data were available for analysis? |                   |                                                      | PY                                               |                                                                             |
|                                                           | 5.2 ... multiple eligible outcome measurements (e.g. scales, definitions, time points) within the outcome domain?                                                                   |                   |                                                      | N                                                |                                                                             |
|                                                           | 5.3 ... multiple eligible analyses of the data?                                                                                                                                     |                   |                                                      | N                                                |                                                                             |
|                                                           | <b>Risk of bias judgement</b>                                                                                                                                                       |                   |                                                      | <b>Low</b>                                       |                                                                             |
| <b>Overall bias</b>                                       | <b>Risk of bias judgement</b>                                                                                                                                                       |                   |                                                      | <b>Low</b>                                       |                                                                             |

|                                                           |                                                                                                                                                                                     |                   |                                                      |                                                  |                                                                             |
|-----------------------------------------------------------|-------------------------------------------------------------------------------------------------------------------------------------------------------------------------------------|-------------------|------------------------------------------------------|--------------------------------------------------|-----------------------------------------------------------------------------|
| <b>Unique ID</b>                                          | 15                                                                                                                                                                                  | <b>Study ID</b>   | He, 2012a                                            | <b>Assessor</b>                                  | JD                                                                          |
| <b>Ref or Label</b>                                       | He, 2012a                                                                                                                                                                           | <b>Aim</b>        | adhering to intervention (the 'per-protocol' effect) | <b>The effect of adhering to intervention...</b> | non-adherence to their assigned intervention by trial participants          |
| <b>Experimental</b>                                       | SnF2                                                                                                                                                                                | <b>Comparator</b> | Positive Control                                     | <b>Source</b>                                    | Journal article(s) with results of the trial                                |
| <b>Outcome</b>                                            | Number of Bleeding Sites                                                                                                                                                            | <b>Results</b>    | Mean treatment difference                            | <b>Weight</b>                                    | 1                                                                           |
| <b>Domain</b>                                             | <b>Signalling question</b>                                                                                                                                                          |                   |                                                      | <b>Response</b>                                  | <b>Comments</b>                                                             |
| <b>Bias arising from the randomization process</b>        | 1.1 Was the allocation sequence random?                                                                                                                                             |                   |                                                      | Y                                                | 2-month, randomized, double-blind, parallel group study                     |
|                                                           | 1.2 Was the allocation sequence concealed until participants were enrolled and assigned to interventions?                                                                           |                   |                                                      | Y                                                |                                                                             |
|                                                           | 1.3 Did baseline differences between intervention groups suggest a problem with the randomization process?                                                                          |                   |                                                      | N                                                | Treatment groups were well balanced with respect to baseline bleeding sites |
|                                                           | <b>Risk of bias judgement</b>                                                                                                                                                       |                   |                                                      | <b>Low</b>                                       |                                                                             |
| <b>Bias due to deviations from intended interventions</b> | 2.1 Were participants aware of their assigned intervention during the trial?                                                                                                        |                   |                                                      | N                                                | Double-blind                                                                |
|                                                           | 2.2 Were carers and people delivering the interventions aware of participants' assigned intervention during the trial?                                                              |                   |                                                      | N                                                |                                                                             |
|                                                           | 2.3. [If applicable:] If Y/PY/NI to 2.1 or 2.2: Were important non-protocol interventions balanced across intervention groups?                                                      |                   |                                                      | NA                                               |                                                                             |
|                                                           | 2.4. [If applicable:] Were there failures in implementing the intervention that could have affected the outcome?                                                                    |                   |                                                      | NA                                               |                                                                             |
|                                                           | 2.5. [If applicable:] Was there non-adherence to the assigned intervention regimen that could have affected participants' outcomes?                                                 |                   |                                                      | N                                                |                                                                             |
|                                                           | 2.6. If N/PN/NI to 2.3, or Y/PY/NI to 2.4 or 2.5: Was an appropriate analysis used to estimate the effect of adhering to the intervention?                                          |                   |                                                      | NA                                               |                                                                             |
|                                                           | <b>Risk of bias judgement</b>                                                                                                                                                       |                   |                                                      | <b>Low</b>                                       |                                                                             |
| <b>Bias due to missing outcome data</b>                   | 3.1 Were data for this outcome available for all, or nearly all, participants randomized?                                                                                           |                   |                                                      | Y                                                | All 150 subjects randomized completed the study                             |
|                                                           | 3.2 If N/PN/NI to 3.1: Is there evidence that result was not biased by missing outcome data?                                                                                        |                   |                                                      | NA                                               |                                                                             |
|                                                           | 3.3 If N/PN to 3.2: Could missingness in the outcome depend on its true value?                                                                                                      |                   |                                                      | NA                                               |                                                                             |
|                                                           | 3.4 If Y/PY/NI to 3.3: Is it likely that missingness in the outcome depended on its true value?                                                                                     |                   |                                                      | NA                                               |                                                                             |
|                                                           | <b>Risk of bias judgement</b>                                                                                                                                                       |                   |                                                      | <b>Low</b>                                       |                                                                             |
| <b>Bias in measurement of the outcome</b>                 | 4.1 Was the method of measuring the outcome inappropriate?                                                                                                                          |                   |                                                      | N                                                | Standard dentistry bleeding site assessments were used                      |
|                                                           | 4.2 Could measurement or ascertainment of the outcome have differed between intervention groups?                                                                                    |                   |                                                      | N                                                |                                                                             |
|                                                           | 4.3 Were outcome assessors aware of the intervention received by study participants?                                                                                                |                   |                                                      | N                                                | The study was double-blind or examiner-blinded                              |
|                                                           | 4.4 If Y/PY/NI to 4.3: Could assessment of the outcome have been influenced by knowledge of intervention received?                                                                  |                   |                                                      | NA                                               |                                                                             |
|                                                           | 4.5 If Y/PY/NI to 4.4: Is it likely that assessment of the outcome was influenced by knowledge of intervention received?                                                            |                   |                                                      | NA                                               |                                                                             |
|                                                           | <b>Risk of bias judgement</b>                                                                                                                                                       |                   |                                                      | <b>Low</b>                                       |                                                                             |
| <b>Bias in selection of the reported result</b>           | 5.1 Were the data that produced this result analysed in accordance with a pre-specified analysis plan that was finalized before unblinded outcome data were available for analysis? |                   |                                                      | PY                                               |                                                                             |
|                                                           | 5.2 ... multiple eligible outcome measurements (e.g. scales, definitions, time points) within the outcome domain?                                                                   |                   |                                                      | N                                                |                                                                             |
|                                                           | 5.3 ... multiple eligible analyses of the data?                                                                                                                                     |                   |                                                      | N                                                |                                                                             |
|                                                           | <b>Risk of bias judgement</b>                                                                                                                                                       |                   |                                                      | <b>Low</b>                                       |                                                                             |
| <b>Overall bias</b>                                       | <b>Risk of bias judgement</b>                                                                                                                                                       |                   |                                                      |                                                  | <b>Low</b>                                                                  |

|                                                           |                                                                                                                                                                                     |                   |                                                      |                                                  |                                                                             |
|-----------------------------------------------------------|-------------------------------------------------------------------------------------------------------------------------------------------------------------------------------------|-------------------|------------------------------------------------------|--------------------------------------------------|-----------------------------------------------------------------------------|
| <b>Unique ID</b>                                          | 16                                                                                                                                                                                  | <b>Study ID</b>   | He, 2012b                                            | <b>Assessor</b>                                  | JD                                                                          |
| <b>Ref or Label</b>                                       | He, 2012b                                                                                                                                                                           | <b>Aim</b>        | adhering to intervention (the 'per-protocol' effect) | <b>The effect of adhering to intervention...</b> | non-adherence to their assigned intervention by trial participants          |
| <b>Experimental</b>                                       | SnF2                                                                                                                                                                                | <b>Comparator</b> | Positive Control                                     | <b>Source</b>                                    | Journal article(s) with results of the trial                                |
| <b>Outcome</b>                                            | Number of Bleeding Sites                                                                                                                                                            | <b>Results</b>    | Mean treatment difference                            | <b>Weight</b>                                    | 1                                                                           |
| <b>Domain</b>                                             | <b>Signalling question</b>                                                                                                                                                          |                   |                                                      | <b>Response</b>                                  | <b>Comments</b>                                                             |
| <b>Bias arising from the randomization process</b>        | 1.1 Was the allocation sequence random?                                                                                                                                             |                   |                                                      | Y                                                | 2-month, randomized, double-blind, parallel group study                     |
|                                                           | 1.2 Was the allocation sequence concealed until participants were enrolled and assigned to interventions?                                                                           |                   |                                                      | Y                                                |                                                                             |
|                                                           | 1.3 Did baseline differences between intervention groups suggest a problem with the randomization process?                                                                          |                   |                                                      | N                                                | Treatment groups were well balanced with respect to baseline bleeding sites |
|                                                           | <b>Risk of bias judgement</b>                                                                                                                                                       |                   |                                                      | <b>Low</b>                                       |                                                                             |
| <b>Bias due to deviations from intended interventions</b> | 2.1 Were participants aware of their assigned intervention during the trial?                                                                                                        |                   |                                                      | N                                                | Double-blind                                                                |
|                                                           | 2.2 Were carers and people delivering the interventions aware of participants' assigned intervention during the trial?                                                              |                   |                                                      | N                                                |                                                                             |
|                                                           | 2.3. [If applicable:] If Y/PY/NI to 2.1 or 2.2: Were important non-protocol interventions balanced across intervention groups?                                                      |                   |                                                      | NA                                               |                                                                             |
|                                                           | 2.4. [If applicable:] Were there failures in implementing the intervention that could have affected the outcome?                                                                    |                   |                                                      | NA                                               |                                                                             |
|                                                           | 2.5. [If applicable:] Was there non-adherence to the assigned intervention regimen that could have affected participants' outcomes?                                                 |                   |                                                      | N                                                |                                                                             |
|                                                           | 2.6. If N/PN/NI to 2.3, or Y/PY/NI to 2.4 or 2.5: Was an appropriate analysis used to estimate the effect of adhering to the intervention?                                          |                   |                                                      | NA                                               |                                                                             |
|                                                           | <b>Risk of bias judgement</b>                                                                                                                                                       |                   |                                                      | <b>Low</b>                                       |                                                                             |
| <b>Bias due to missing outcome data</b>                   | 3.1 Were data for this outcome available for all, or nearly all, participants randomized?                                                                                           |                   |                                                      | Y                                                | 196 of 200 subjects randomized were evaluated in the analysis               |
|                                                           | 3.2 If N/PN/NI to 3.1: Is there evidence that result was not biased by missing outcome data?                                                                                        |                   |                                                      | NA                                               |                                                                             |
|                                                           | 3.3 If N/PN to 3.2: Could missingness in the outcome depend on its true value?                                                                                                      |                   |                                                      | NA                                               |                                                                             |
|                                                           | 3.4 If Y/PY/NI to 3.3: Is it likely that missingness in the outcome depended on its true value?                                                                                     |                   |                                                      | NA                                               |                                                                             |
|                                                           | <b>Risk of bias judgement</b>                                                                                                                                                       |                   |                                                      | <b>Low</b>                                       |                                                                             |
| <b>Bias in measurement of the outcome</b>                 | 4.1 Was the method of measuring the outcome inappropriate?                                                                                                                          |                   |                                                      | N                                                | Standard dentistry bleeding site assessments were used                      |
|                                                           | 4.2 Could measurement or ascertainment of the outcome have differed between intervention groups?                                                                                    |                   |                                                      | N                                                |                                                                             |
|                                                           | 4.3 Were outcome assessors aware of the intervention received by study participants?                                                                                                |                   |                                                      | N                                                | The study was double-blind or examiner-blinded                              |
|                                                           | 4.4 If Y/PY/NI to 4.3: Could assessment of the outcome have been influenced by knowledge of intervention received?                                                                  |                   |                                                      | NA                                               |                                                                             |
|                                                           | 4.5 If Y/PY/NI to 4.4: Is it likely that assessment of the outcome was influenced by knowledge of intervention received?                                                            |                   |                                                      | NA                                               |                                                                             |
|                                                           | <b>Risk of bias judgement</b>                                                                                                                                                       |                   |                                                      | <b>Low</b>                                       |                                                                             |
| <b>Bias in selection of the reported result</b>           | 5.1 Were the data that produced this result analysed in accordance with a pre-specified analysis plan that was finalized before unblinded outcome data were available for analysis? |                   |                                                      | PY                                               |                                                                             |
|                                                           | 5.2 ... multiple eligible outcome measurements (e.g. scales, definitions, time points) within the outcome domain?                                                                   |                   |                                                      | N                                                |                                                                             |
|                                                           | 5.3 ... multiple eligible analyses of the data?                                                                                                                                     |                   |                                                      | N                                                |                                                                             |
|                                                           | <b>Risk of bias judgement</b>                                                                                                                                                       |                   |                                                      | <b>Low</b>                                       |                                                                             |
| <b>Overall bias</b>                                       | <b>Risk of bias judgement</b>                                                                                                                                                       |                   |                                                      | <b>Low</b>                                       |                                                                             |



|                                                           |                                                                                                                                                                                     |                   |                                                      |                                                  |                                                                             |
|-----------------------------------------------------------|-------------------------------------------------------------------------------------------------------------------------------------------------------------------------------------|-------------------|------------------------------------------------------|--------------------------------------------------|-----------------------------------------------------------------------------|
| <b>Unique ID</b>                                          | 17                                                                                                                                                                                  | <b>Study ID</b>   | Mankodi 2009, S8                                     | <b>Assessor</b>                                  | JD                                                                          |
| <b>Ref or Label</b>                                       | Mankodi 2009, S8                                                                                                                                                                    | <b>Aim</b>        | adhering to intervention (the 'per-protocol' effect) | <b>The effect of adhering to intervention...</b> | non-adherence to their assigned intervention by trial participants          |
| <b>Experimental</b>                                       | SnF2                                                                                                                                                                                | <b>Comparator</b> | Positive Control                                     | <b>Source</b>                                    | Conference abstract(s) about the trial                                      |
| <b>Outcome</b>                                            | Number of Bleeding Sites                                                                                                                                                            | <b>Results</b>    | Mean treatment difference                            | <b>Weight</b>                                    | 1                                                                           |
| <b>Domain</b>                                             | <b>Signalling question</b>                                                                                                                                                          |                   |                                                      | <b>Response</b>                                  | <b>Comments</b>                                                             |
| <b>Bias arising from the randomization process</b>        | 1.1 Was the allocation sequence random?                                                                                                                                             |                   |                                                      | Y                                                | Randomized, positive-controlled, double-blind, parallel-group study         |
|                                                           | 1.2 Was the allocation sequence concealed until participants were enrolled and assigned to interventions?                                                                           |                   |                                                      | Y                                                |                                                                             |
|                                                           | 1.3 Did baseline differences between intervention groups suggest a problem with the randomization process?                                                                          |                   |                                                      | N                                                | Treatment groups were well balanced with respect to baseline bleeding sites |
|                                                           | <b>Risk of bias judgement</b>                                                                                                                                                       |                   |                                                      | <b>Low</b>                                       |                                                                             |
| <b>Bias due to deviations from intended interventions</b> | 2.1 Were participants aware of their assigned intervention during the trial?                                                                                                        |                   |                                                      | N                                                | Double-blind                                                                |
|                                                           | 2.2 Were carers and people delivering the interventions aware of participants' assigned intervention during the trial?                                                              |                   |                                                      | N                                                |                                                                             |
|                                                           | 2.3. [If applicable:] If Y/PY/NI to 2.1 or 2.2: Were important non-protocol interventions balanced across intervention groups?                                                      |                   |                                                      | NA                                               |                                                                             |
|                                                           | 2.4. [If applicable:] Were there failures in implementing the intervention that could have affected the outcome?                                                                    |                   |                                                      | NA                                               |                                                                             |
|                                                           | 2.5. [If applicable:] Was there non-adherence to the assigned intervention regimen that could have affected participants' outcomes?                                                 |                   |                                                      | N                                                |                                                                             |
|                                                           | 2.6. If N/PN/NI to 2.3, or Y/PY/NI to 2.4 or 2.5: Was an appropriate analysis used to estimate the effect of adhering to the intervention?                                          |                   |                                                      | NA                                               |                                                                             |
|                                                           | <b>Risk of bias judgement</b>                                                                                                                                                       |                   |                                                      | <b>Low</b>                                       |                                                                             |
| <b>Bias due to missing outcome data</b>                   | 3.1 Were data for this outcome available for all, or nearly all, participants randomized?                                                                                           |                   |                                                      | Y                                                | 205 subjects randomized                                                     |
|                                                           | 3.2 If N/PN/NI to 3.1: Is there evidence that result was not biased by missing outcome data?                                                                                        |                   |                                                      | NA                                               |                                                                             |
|                                                           | 3.3 If N/PN to 3.2: Could missingness in the outcome depend on its true value?                                                                                                      |                   |                                                      | NA                                               |                                                                             |
|                                                           | 3.4 If Y/PY/NI to 3.3: Is it likely that missingness in the outcome depended on its true value?                                                                                     |                   |                                                      | NA                                               |                                                                             |
|                                                           | <b>Risk of bias judgement</b>                                                                                                                                                       |                   |                                                      | <b>Low</b>                                       |                                                                             |
| <b>Bias in measurement of the outcome</b>                 | 4.1 Was the method of measuring the outcome inappropriate?                                                                                                                          |                   |                                                      | N                                                | Standard dentistry bleeding site assessments were used                      |
|                                                           | 4.2 Could measurement or ascertainment of the outcome have differed between intervention groups?                                                                                    |                   |                                                      | N                                                |                                                                             |
|                                                           | 4.3 Were outcome assessors aware of the intervention received by study participants?                                                                                                |                   |                                                      | N                                                | The study was double-blind or examiner-blinded                              |
|                                                           | 4.4 If Y/PY/NI to 4.3: Could assessment of the outcome have been influenced by knowledge of intervention received?                                                                  |                   |                                                      | NA                                               |                                                                             |
|                                                           | 4.5 If Y/PY/NI to 4.4: Is it likely that assessment of the outcome was influenced by knowledge of intervention received?                                                            |                   |                                                      | NA                                               |                                                                             |
|                                                           | <b>Risk of bias judgement</b>                                                                                                                                                       |                   |                                                      | <b>Low</b>                                       |                                                                             |
| <b>Bias in selection of the reported result</b>           | 5.1 Were the data that produced this result analysed in accordance with a pre-specified analysis plan that was finalized before unblinded outcome data were available for analysis? |                   |                                                      | PY                                               |                                                                             |
|                                                           | 5.2 ... multiple eligible outcome measurements (e.g. scales, definitions, time points) within the outcome domain?                                                                   |                   |                                                      | N                                                |                                                                             |
|                                                           | 5.3 ... multiple eligible analyses of the data?                                                                                                                                     |                   |                                                      | N                                                |                                                                             |
|                                                           | <b>Risk of bias judgement</b>                                                                                                                                                       |                   |                                                      | <b>Low</b>                                       |                                                                             |
| <b>Overall bias</b>                                       | <b>Risk of bias judgement</b>                                                                                                                                                       |                   |                                                      | <b>Low</b>                                       |                                                                             |

|                                                           |                                                                                                                                                                                     |                   |                                                      |                                                  |                                                                             |
|-----------------------------------------------------------|-------------------------------------------------------------------------------------------------------------------------------------------------------------------------------------|-------------------|------------------------------------------------------|--------------------------------------------------|-----------------------------------------------------------------------------|
| <b>Unique ID</b>                                          | 18                                                                                                                                                                                  | <b>Study ID</b>   | Archila, 2005                                        | <b>Assessor</b>                                  | JD                                                                          |
| <b>Ref or Label</b>                                       | Archila, 2005                                                                                                                                                                       | <b>Aim</b>        | adhering to intervention (the 'per-protocol' effect) | <b>The effect of adhering to intervention...</b> | non-adherence to their assigned intervention by trial participants          |
| <b>Experimental</b>                                       | SnF2                                                                                                                                                                                | <b>Comparator</b> | Positive Control                                     | <b>Source</b>                                    | Journal article(s) with results of the trial                                |
| <b>Outcome</b>                                            | Number of Bleeding Sites                                                                                                                                                            | <b>Results</b>    | Mean treatment difference                            | <b>Weight</b>                                    | 1                                                                           |
| <b>Domain</b>                                             | <b>Signalling question</b>                                                                                                                                                          |                   |                                                      | <b>Response</b>                                  | <b>Comments</b>                                                             |
| <b>Bias arising from the randomization process</b>        | 1.1 Was the allocation sequence random?                                                                                                                                             |                   |                                                      | Y                                                | Randomized, double-blind study                                              |
|                                                           | 1.2 Was the allocation sequence concealed until participants were enrolled and assigned to interventions?                                                                           |                   |                                                      | Y                                                |                                                                             |
|                                                           | 1.3 Did baseline differences between intervention groups suggest a problem with the randomization process?                                                                          |                   |                                                      | N                                                | Treatment groups were well balanced with respect to baseline bleeding sites |
|                                                           | <b>Risk of bias judgement</b>                                                                                                                                                       |                   |                                                      | <b>Low</b>                                       |                                                                             |
| <b>Bias due to deviations from intended interventions</b> | 2.1 Were participants aware of their assigned intervention during the trial?                                                                                                        |                   |                                                      | N                                                | Double-blind                                                                |
|                                                           | 2.2 Were carers and people delivering the interventions aware of participants' assigned intervention during the trial?                                                              |                   |                                                      | N                                                |                                                                             |
|                                                           | 2.3. [If applicable:] If Y/PY/NI to 2.1 or 2.2: Were important non-protocol interventions balanced across intervention groups?                                                      |                   |                                                      | NA                                               |                                                                             |
|                                                           | 2.4. [If applicable:] Were there failures in implementing the intervention that could have affected the outcome?                                                                    |                   |                                                      | NA                                               |                                                                             |
|                                                           | 2.5. [If applicable:] Was there non-adherence to the assigned intervention regimen that could have affected participants' outcomes?                                                 |                   |                                                      | N                                                |                                                                             |
|                                                           | 2.6. If N/PN/NI to 2.3, or Y/PY/NI to 2.4 or 2.5: Was an appropriate analysis used to estimate the effect of adhering to the intervention?                                          |                   |                                                      | NA                                               |                                                                             |
|                                                           | <b>Risk of bias judgement</b>                                                                                                                                                       |                   |                                                      | <b>Low</b>                                       |                                                                             |
| <b>Bias due to missing outcome data</b>                   | 3.1 Were data for this outcome available for all, or nearly all, participants randomized?                                                                                           |                   |                                                      | Y                                                | 196 of 199 subjects randomized were evaluated in the analysis               |
|                                                           | 3.2 If N/PN/NI to 3.1: Is there evidence that result was not biased by missing outcome data?                                                                                        |                   |                                                      | NA                                               |                                                                             |
|                                                           | 3.3 If N/PN to 3.2: Could missingness in the outcome depend on its true value?                                                                                                      |                   |                                                      | NA                                               |                                                                             |
|                                                           | 3.4 If Y/PY/NI to 3.3: Is it likely that missingness in the outcome depended on its true value?                                                                                     |                   |                                                      | NA                                               |                                                                             |
|                                                           | <b>Risk of bias judgement</b>                                                                                                                                                       |                   |                                                      | <b>Low</b>                                       |                                                                             |
| <b>Bias in measurement of the outcome</b>                 | 4.1 Was the method of measuring the outcome inappropriate?                                                                                                                          |                   |                                                      | N                                                | Standard dentistry bleeding site assessments were used                      |
|                                                           | 4.2 Could measurement or ascertainment of the outcome have differed between intervention groups?                                                                                    |                   |                                                      | N                                                |                                                                             |
|                                                           | 4.3 Were outcome assessors aware of the intervention received by study participants?                                                                                                |                   |                                                      | N                                                | The study was double-blind or examiner-blinded                              |
|                                                           | 4.4 If Y/PY/NI to 4.3: Could assessment of the outcome have been influenced by knowledge of intervention received?                                                                  |                   |                                                      | NA                                               |                                                                             |
|                                                           | 4.5 If Y/PY/NI to 4.4: Is it likely that assessment of the outcome was influenced by knowledge of intervention received?                                                            |                   |                                                      | NA                                               |                                                                             |
|                                                           | <b>Risk of bias judgement</b>                                                                                                                                                       |                   |                                                      | <b>Low</b>                                       |                                                                             |
| <b>Bias in selection of the reported result</b>           | 5.1 Were the data that produced this result analysed in accordance with a pre-specified analysis plan that was finalized before unblinded outcome data were available for analysis? |                   |                                                      | PY                                               |                                                                             |
|                                                           | 5.2 ... multiple eligible outcome measurements (e.g. scales, definitions, time points) within the outcome domain?                                                                   |                   |                                                      | N                                                |                                                                             |
|                                                           | 5.3 ... multiple eligible analyses of the data?                                                                                                                                     |                   |                                                      | N                                                |                                                                             |
|                                                           | <b>Risk of bias judgement</b>                                                                                                                                                       |                   |                                                      | <b>Low</b>                                       |                                                                             |
| <b>Overall bias</b>                                       | <b>Risk of bias judgement</b>                                                                                                                                                       |                   |                                                      |                                                  | <b>Low</b>                                                                  |

|                                                           |                                                                                                                                                                                     |                   |                                                      |                                                  |                                                                             |
|-----------------------------------------------------------|-------------------------------------------------------------------------------------------------------------------------------------------------------------------------------------|-------------------|------------------------------------------------------|--------------------------------------------------|-----------------------------------------------------------------------------|
| <b>Unique ID</b>                                          | 19                                                                                                                                                                                  | <b>Study ID</b>   | McClanahan, 1997                                     | <b>Assessor</b>                                  | JD                                                                          |
| <b>Ref or Label</b>                                       | McClanahan, 1997                                                                                                                                                                    | <b>Aim</b>        | adhering to intervention (the 'per-protocol' effect) | <b>The effect of adhering to intervention...</b> | non-adherence to their assigned intervention by trial participants          |
| <b>Experimental</b>                                       | SnF2                                                                                                                                                                                | <b>Comparator</b> | Positive Control                                     | <b>Source</b>                                    | Journal article(s) with results of the trial                                |
| <b>Outcome</b>                                            | Number of Bleeding Sites                                                                                                                                                            | <b>Results</b>    | Mean treatment difference                            | <b>Weight</b>                                    | 1                                                                           |
| <b>Domain</b>                                             | <b>Signalling question</b>                                                                                                                                                          |                   |                                                      | <b>Response</b>                                  | <b>Comments</b>                                                             |
| <b>Bias arising from the randomization process</b>        | 1.1 Was the allocation sequence random?                                                                                                                                             |                   |                                                      | Y                                                | Parallel-group, double-blind, placebo-controlled study                      |
|                                                           | 1.2 Was the allocation sequence concealed until participants were enrolled and assigned to interventions?                                                                           |                   |                                                      | Y                                                |                                                                             |
|                                                           | 1.3 Did baseline differences between intervention groups suggest a problem with the randomization process?                                                                          |                   |                                                      | N                                                | Treatment groups were well balanced with respect to baseline bleeding sites |
|                                                           | <b>Risk of bias judgement</b>                                                                                                                                                       |                   |                                                      | <b>Low</b>                                       |                                                                             |
| <b>Bias due to deviations from intended interventions</b> | 2.1 Were participants aware of their assigned intervention during the trial?                                                                                                        |                   |                                                      | N                                                | Double-blind                                                                |
|                                                           | 2.2 Were carers and people delivering the interventions aware of participants' assigned intervention during the trial?                                                              |                   |                                                      | N                                                |                                                                             |
|                                                           | 2.3. [If applicable:] If Y/PY/NI to 2.1 or 2.2: Were important non-protocol interventions balanced across intervention groups?                                                      |                   |                                                      | NA                                               |                                                                             |
|                                                           | 2.4. [If applicable:] Were there failures in implementing the intervention that could have affected the outcome?                                                                    |                   |                                                      | NA                                               |                                                                             |
|                                                           | 2.5. [If applicable:] Was there non-adherence to the assigned intervention regimen that could have affected participants' outcomes?                                                 |                   |                                                      | N                                                |                                                                             |
|                                                           | 2.6. If N/PN/NI to 2.3, or Y/PY/NI to 2.4 or 2.5: Was an appropriate analysis used to estimate the effect of adhering to the intervention?                                          |                   |                                                      | NA                                               |                                                                             |
|                                                           | <b>Risk of bias judgement</b>                                                                                                                                                       |                   |                                                      | <b>Low</b>                                       |                                                                             |
| <b>Bias due to missing outcome data</b>                   | 3.1 Were data for this outcome available for all, or nearly all, participants randomized?                                                                                           |                   |                                                      | Y                                                | 546 of 570 subjects randomized were evaluated in the analysis               |
|                                                           | 3.2 If N/PN/NI to 3.1: Is there evidence that result was not biased by missing outcome data?                                                                                        |                   |                                                      | NA                                               |                                                                             |
|                                                           | 3.3 If N/PN to 3.2: Could missingness in the outcome depend on its true value?                                                                                                      |                   |                                                      | NA                                               |                                                                             |
|                                                           | 3.4 If Y/PY/NI to 3.3: Is it likely that missingness in the outcome depended on its true value?                                                                                     |                   |                                                      | NA                                               |                                                                             |
|                                                           | <b>Risk of bias judgement</b>                                                                                                                                                       |                   |                                                      | <b>Low</b>                                       |                                                                             |
| <b>Bias in measurement of the outcome</b>                 | 4.1 Was the method of measuring the outcome inappropriate?                                                                                                                          |                   |                                                      | N                                                | Standard dentistry bleeding site assessments were used                      |
|                                                           | 4.2 Could measurement or ascertainment of the outcome have differed between intervention groups?                                                                                    |                   |                                                      | N                                                |                                                                             |
|                                                           | 4.3 Were outcome assessors aware of the intervention received by study participants?                                                                                                |                   |                                                      | N                                                | The study was double-blind or examiner-blinded                              |
|                                                           | 4.4 If Y/PY/NI to 4.3: Could assessment of the outcome have been influenced by knowledge of intervention received?                                                                  |                   |                                                      | NA                                               |                                                                             |
|                                                           | 4.5 If Y/PY/NI to 4.4: Is it likely that assessment of the outcome was influenced by knowledge of intervention received?                                                            |                   |                                                      | NA                                               |                                                                             |
|                                                           | <b>Risk of bias judgement</b>                                                                                                                                                       |                   |                                                      | <b>Low</b>                                       |                                                                             |
| <b>Bias in selection of the reported result</b>           | 5.1 Were the data that produced this result analysed in accordance with a pre-specified analysis plan that was finalized before unblinded outcome data were available for analysis? |                   |                                                      | PY                                               |                                                                             |
|                                                           | 5.2 ... multiple eligible outcome measurements (e.g. scales, definitions, time points) within the outcome domain?                                                                   |                   |                                                      | N                                                |                                                                             |
|                                                           | 5.3 ... multiple eligible analyses of the data?                                                                                                                                     |                   |                                                      | N                                                |                                                                             |
|                                                           | <b>Risk of bias judgement</b>                                                                                                                                                       |                   |                                                      | <b>Low</b>                                       |                                                                             |
| <b>Overall bias</b>                                       | <b>Risk of bias judgement</b>                                                                                                                                                       |                   |                                                      | <b>Low</b>                                       |                                                                             |
